# Supplementary material for: Synthesis of 3,4-Bis(Butylselanyl)Selenophenes and 4-Alkoxyselenophenes Promoted by Oxone®
Source: MDPI journal article supplement (doi:10.3390/molecules26082378), 2021-04-19
Supplement: s1 [file s1]

# Synthesis of 3,4-Bis(butylselanyl)selenophenes and 4-Alkoxyselenophenes Promoted by Oxone<sup>®</sup>

Paola S. Hellwig,<sup>1</sup> Jonatan S. Guedes,<sup>1</sup> Angelita M. Barcellos,<sup>1</sup> Gelson Perin,<sup>\*1</sup> and Eder J. Lenardão<sup>\*1</sup>

<sup>1</sup>LASOL - CCQFA, Universidade Federal de Pelotas - UFPel, P.O. Box 354, 96010-900 Pelotas, RS, Brazil.

\* Correspondence: gelson\_perin@ufpel.edu.br (G.P.); lenardao@ufpel.edu.br (E.J.L.); Tel.: +55-53-32757356 (G.P. & E.J.L.)

## Contents

|                                                                                     |    |
|-------------------------------------------------------------------------------------|----|
| General procedure for the synthesis of (2,2-dibromovinyl)benzene <b>6a-i</b> .....  | S2 |
| General procedure for the synthesis of symmetric 1,3-diynes <b>1a-i</b> .....       | S2 |
| References.....                                                                     | S3 |
| Copies of ( <sup>1</sup> H, <sup>13</sup> C and <sup>77</sup> Se) NMR spectra ..... | S4 |

### General procedure for the synthesis of (2,2-dibromovinyl)benzene 6a-i

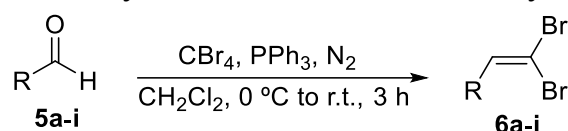

The compounds were prepared according to a published procedure.<sup>1,2</sup> To a round-bottomed flask containing the appropriate aldehyde **5** (10.0 mmol) in dry dichloromethane (30.0 mL) under nitrogen atmosphere and magnetic stirring at room temperature, a solution of CBr<sub>4</sub> (3.93 g, 12.0 mmol) in dichloromethane (20.0 mL) was added. The reaction system was cooled at 0 °C and Ph<sub>3</sub>P (6.55 g; 25.0 mmol) was added dropwise during 30 min. Then, the resulting mixture was stirred for additional 3 h at room temperature. After that, hexane (50.0 mL) was added, and the crude mixture was filtered using silica gel. The eluted part was concentrated for further purification by column chromatography (100-200 mesh silica gel) using hexane as the eluent. Yield: 75-95%.

### General procedure for the synthesis of symmetric 1,3-diynes 1a-i

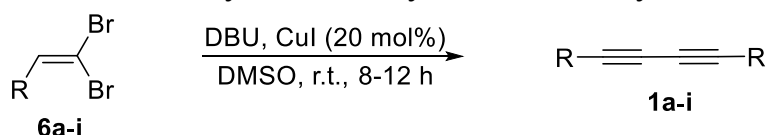

**1a** R = C<sub>6</sub>H<sub>5</sub>, 90%

**1b** R = 4-CH<sub>3</sub>OC<sub>6</sub>H<sub>4</sub>, 85%

**1c** R = 4-CH<sub>3</sub>C<sub>6</sub>H<sub>4</sub>, 80%

**1d** R = 4-ClC<sub>6</sub>H<sub>4</sub>, 65%

**1e** R = 2-naphthyl, 85%

**1f** R = C<sub>4</sub>H<sub>9</sub>, 45%

**1g** R = C<sub>2</sub>H<sub>2</sub>OH, 48%

**1h** R = 2-CH<sub>3</sub>C<sub>6</sub>H<sub>4</sub>, 60%

**1i** R = 2-ClC<sub>6</sub>H<sub>4</sub>, 50%

The compounds were prepared according to a published procedure.<sup>3</sup> To a sealed tube were added DMSO (2.0 mL), the appropriate (2,2-dibromovinyl)benzene (1.0 mmol), CuI (20 mol%, 0.038 g), DBU (2.0 mmol, 0.304 g). The mixture was stirred at room temperature (25 °C) for 8-12 h. Then a saturated sodium chloride solution (10.0 mL) was added, and the product was extracted with ethyl acetate (3x 15.0 mL). The organic layer was separated, dried with MgSO<sub>4</sub> and concentrated under vacuum. The residue was purified

by column chromatography using silica gel and eluted with hexane/ethyl acetate in different proportions. Yields: 45-90%.

#### References:

1. Corey, E.J.; Fuchs, P.L. A Synthetic Method for Formyl→Ethynyl Conversion ( $\text{RCHO} \rightarrow \text{RC-CH}$  or  $\text{RC-CR}'$ ). *Tetrahedron Lett.* **1972**, 36, 3769-3772; doi: 10.1016/S0040-4039(01)94157-7.
2. Huh, D.H.; Jeong, J.S.; Lee, H.B.; Ryu, H.; Kim, Y.G. An Efficient Method for One-carbon Elongation of Aryl Aldehydes via their Dibromoalkene Derivatives. *Tetrahedron* **2002**, 58, 9925-9932; doi: 10.1016/S0040-4020(02)01324-8.
3. Hui, J.; Chunxiang, K. Ligand-free Copper-catalyzed Synthesis of Symmetrical Diynes from 1,1-Dibromo-1-alkenes. *Chin. J. Chem.* **2011**, 29, 592-594; doi: 10.1002/chin.201130087.

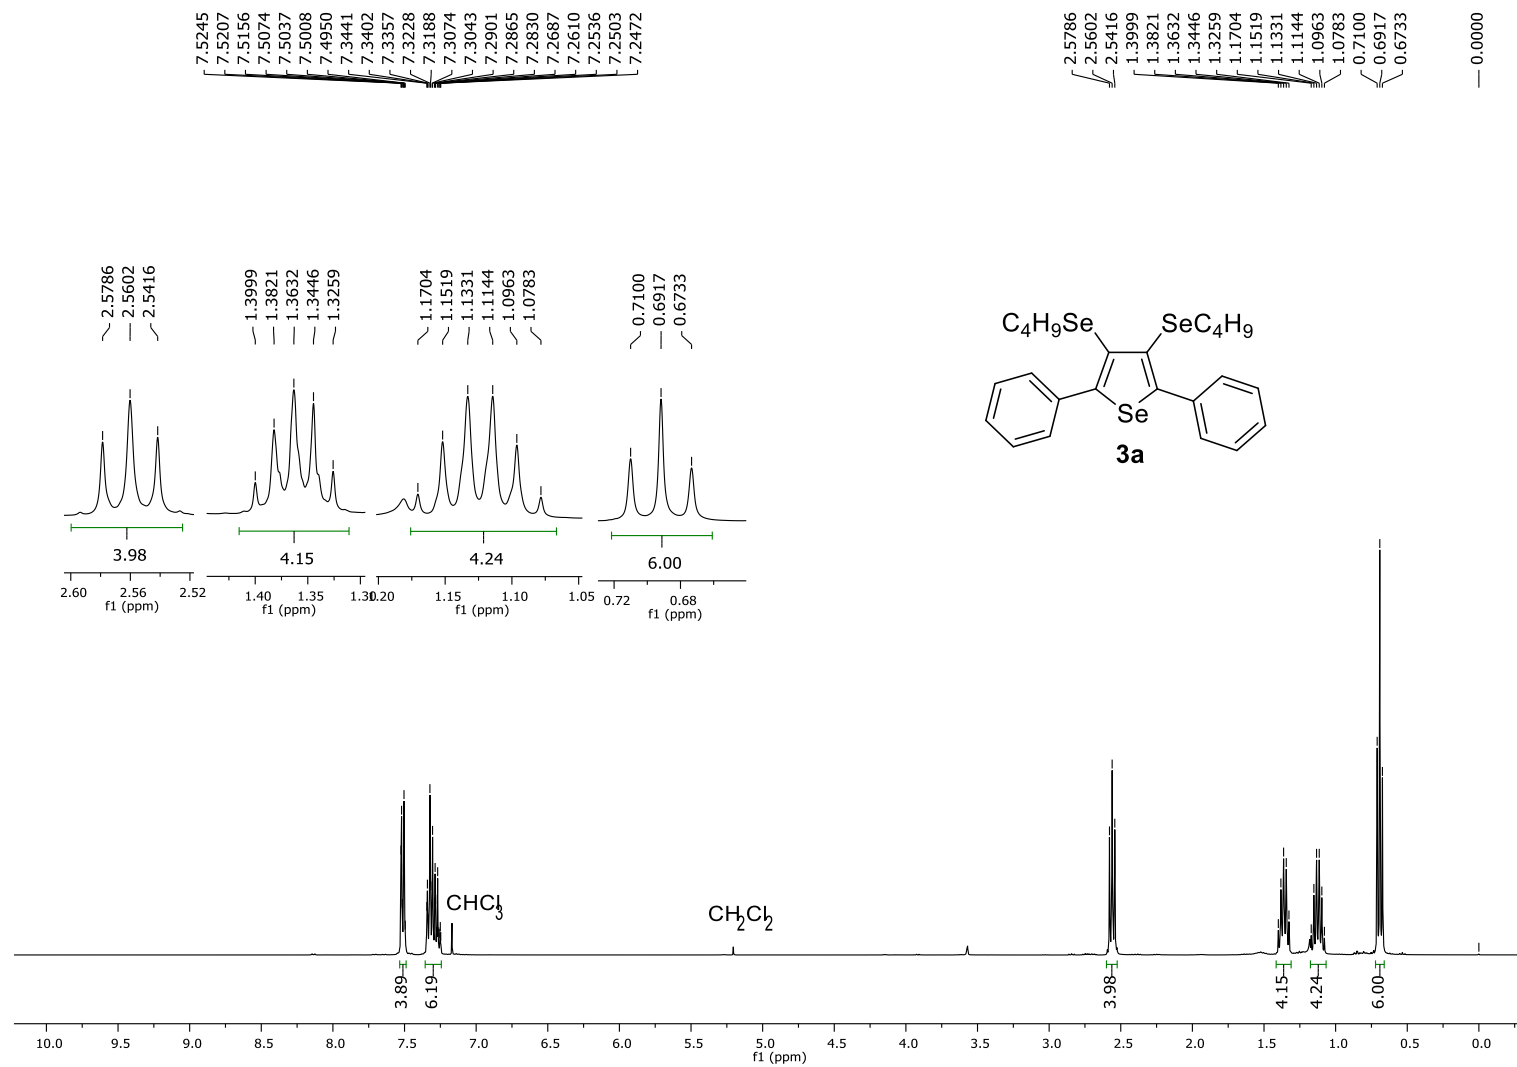

**Figure S1:** <sup>1</sup>H NMR (400 MHz, CDCl<sub>3</sub>) spectrum of compound **3a**.

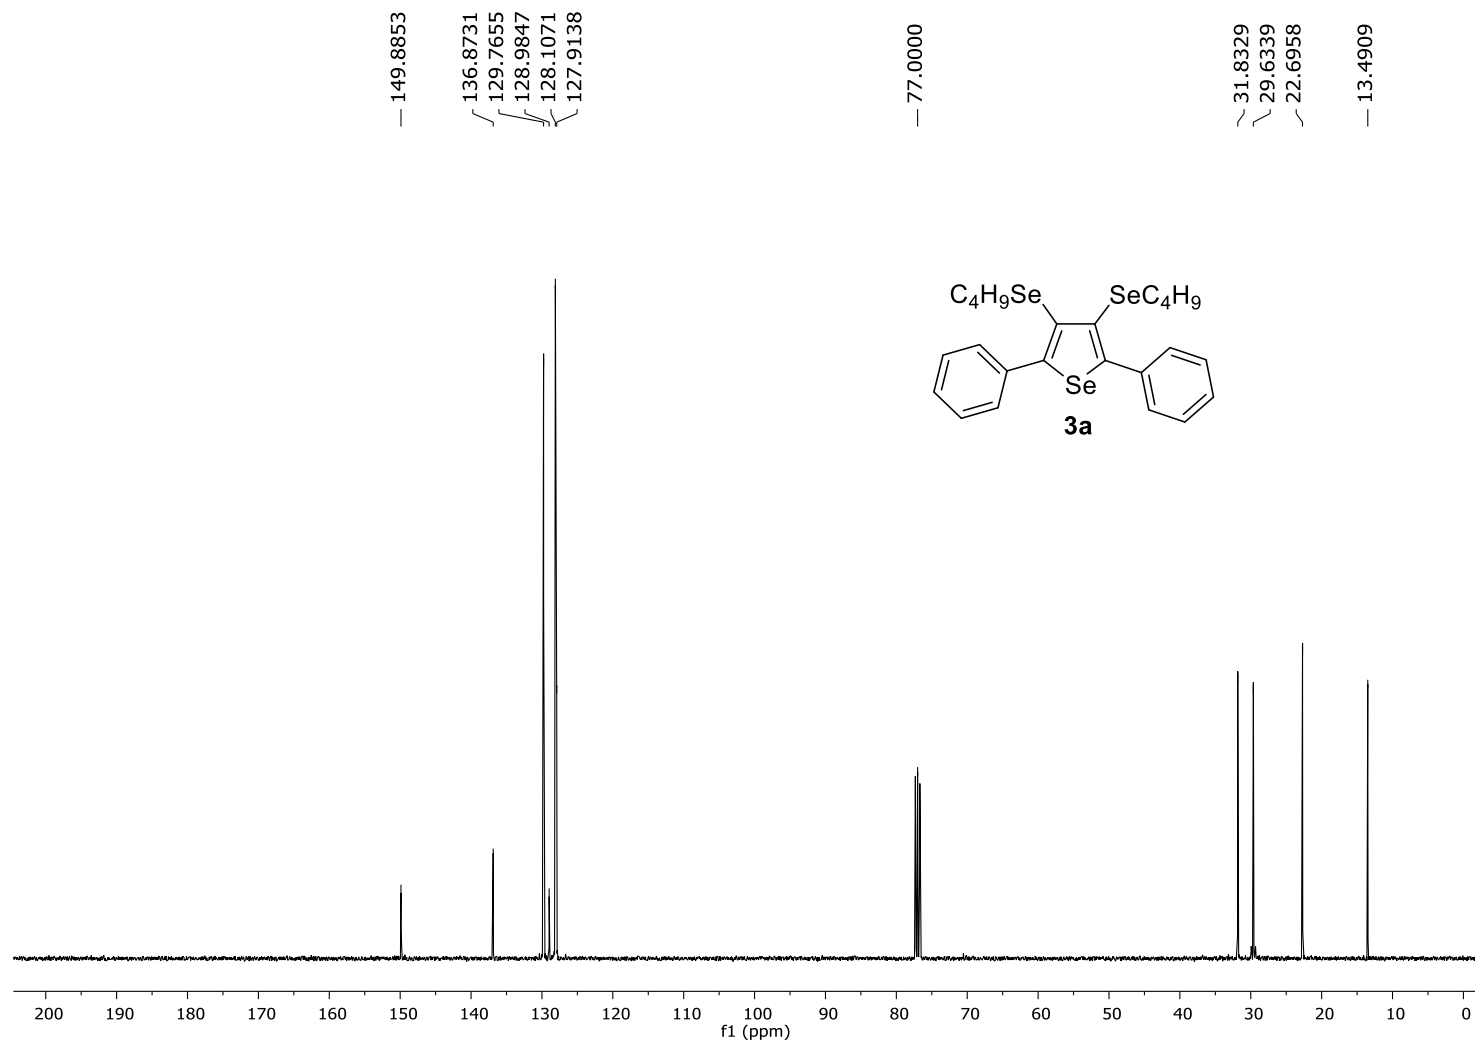

**Figure S2:** <sup>13</sup>C NMR (100 MHz, CDCl<sub>3</sub>) spectrum of compound **3a**.

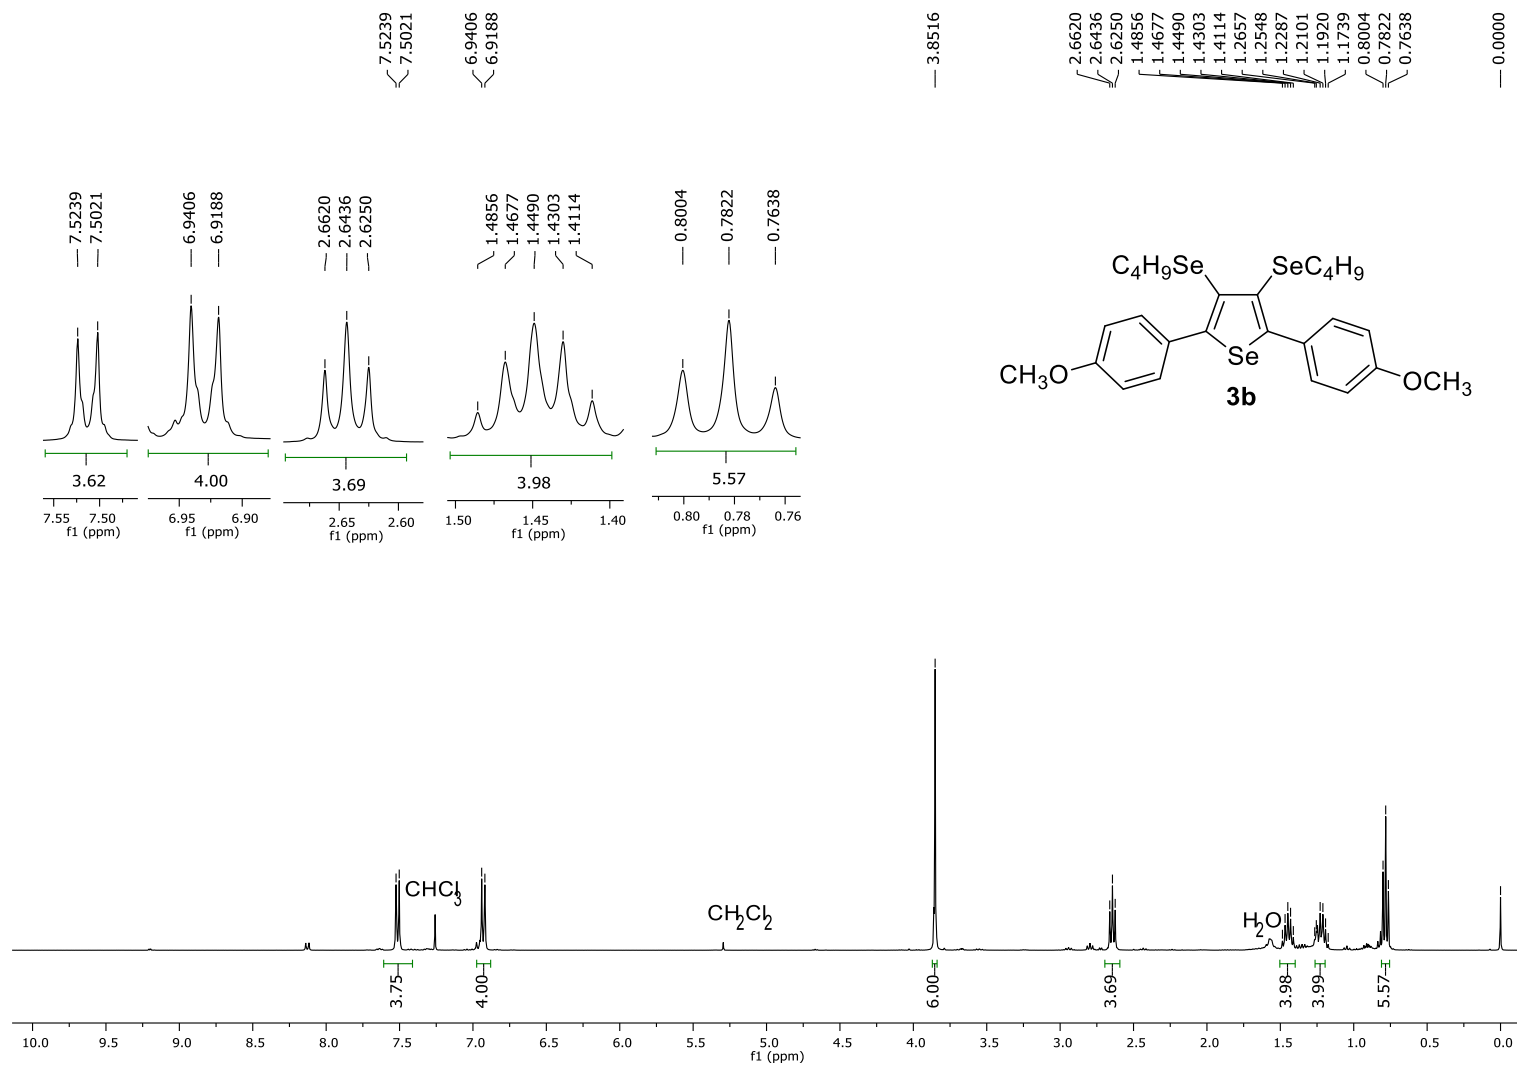

**Figure S3:** <sup>1</sup>H NMR (400 MHz, CDCl<sub>3</sub>) spectrum of compound **3b**.



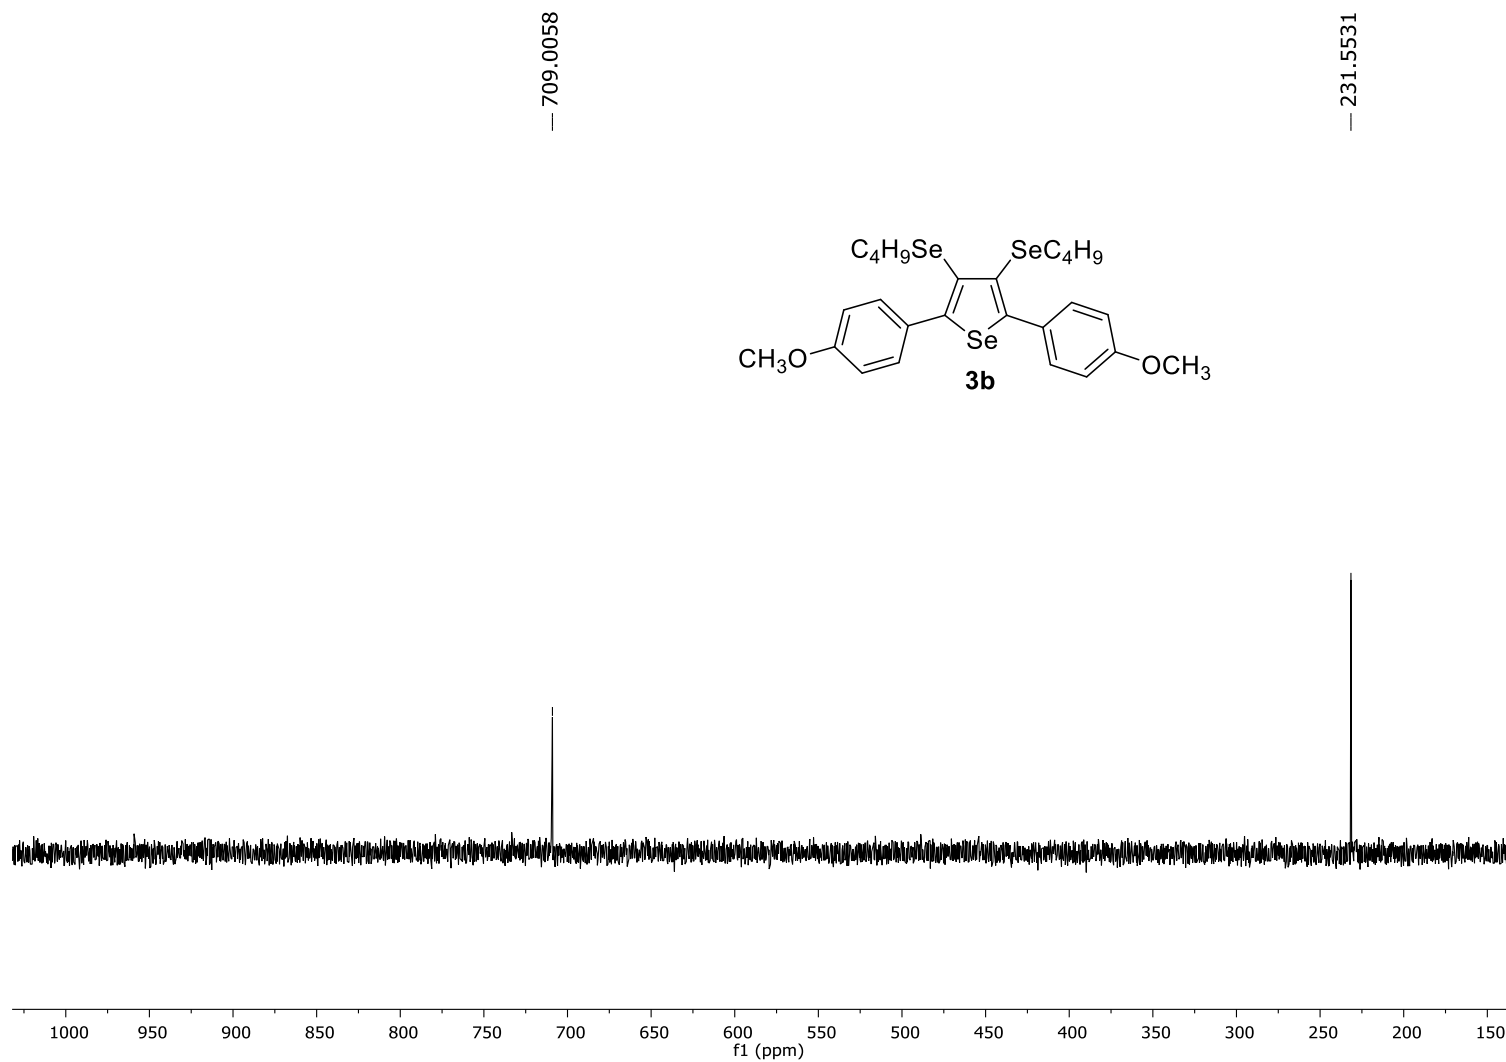

**Figure S5:**  $^{77}\text{Se}$  NMR (76 MHz,  $\text{CDCl}_3$ ) spectrum of compound **3b**.

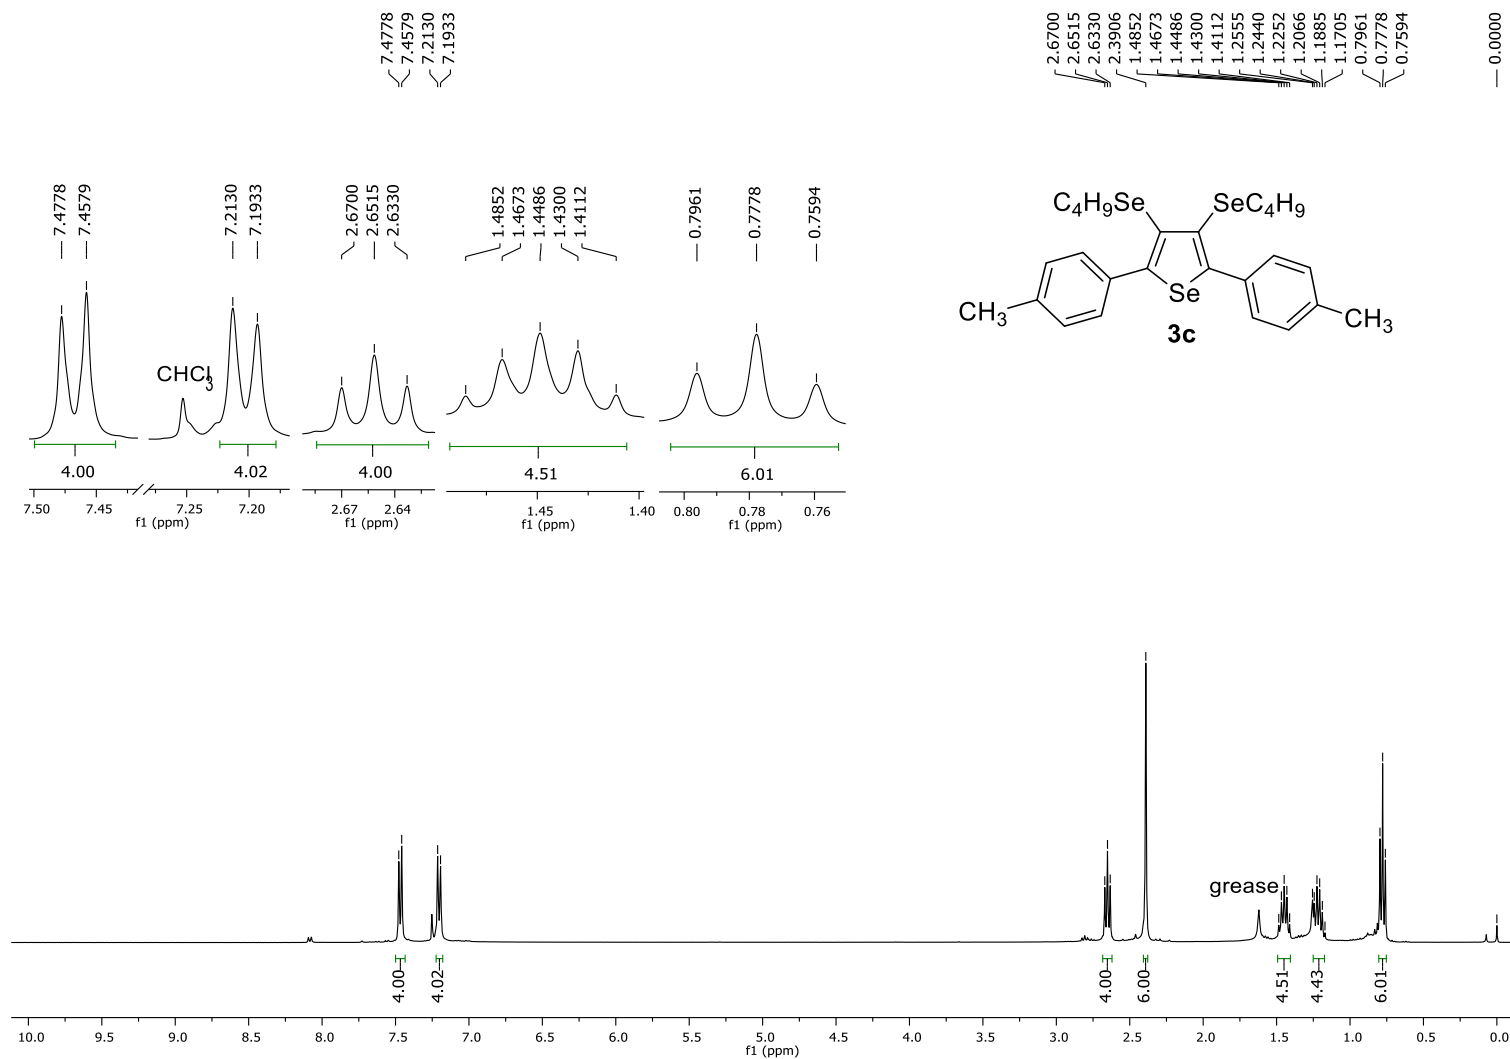

**Figure S6:**  $^1\text{H}$  NMR (400 MHz,  $\text{CDCl}_3$ ) spectrum of compound **3c**.

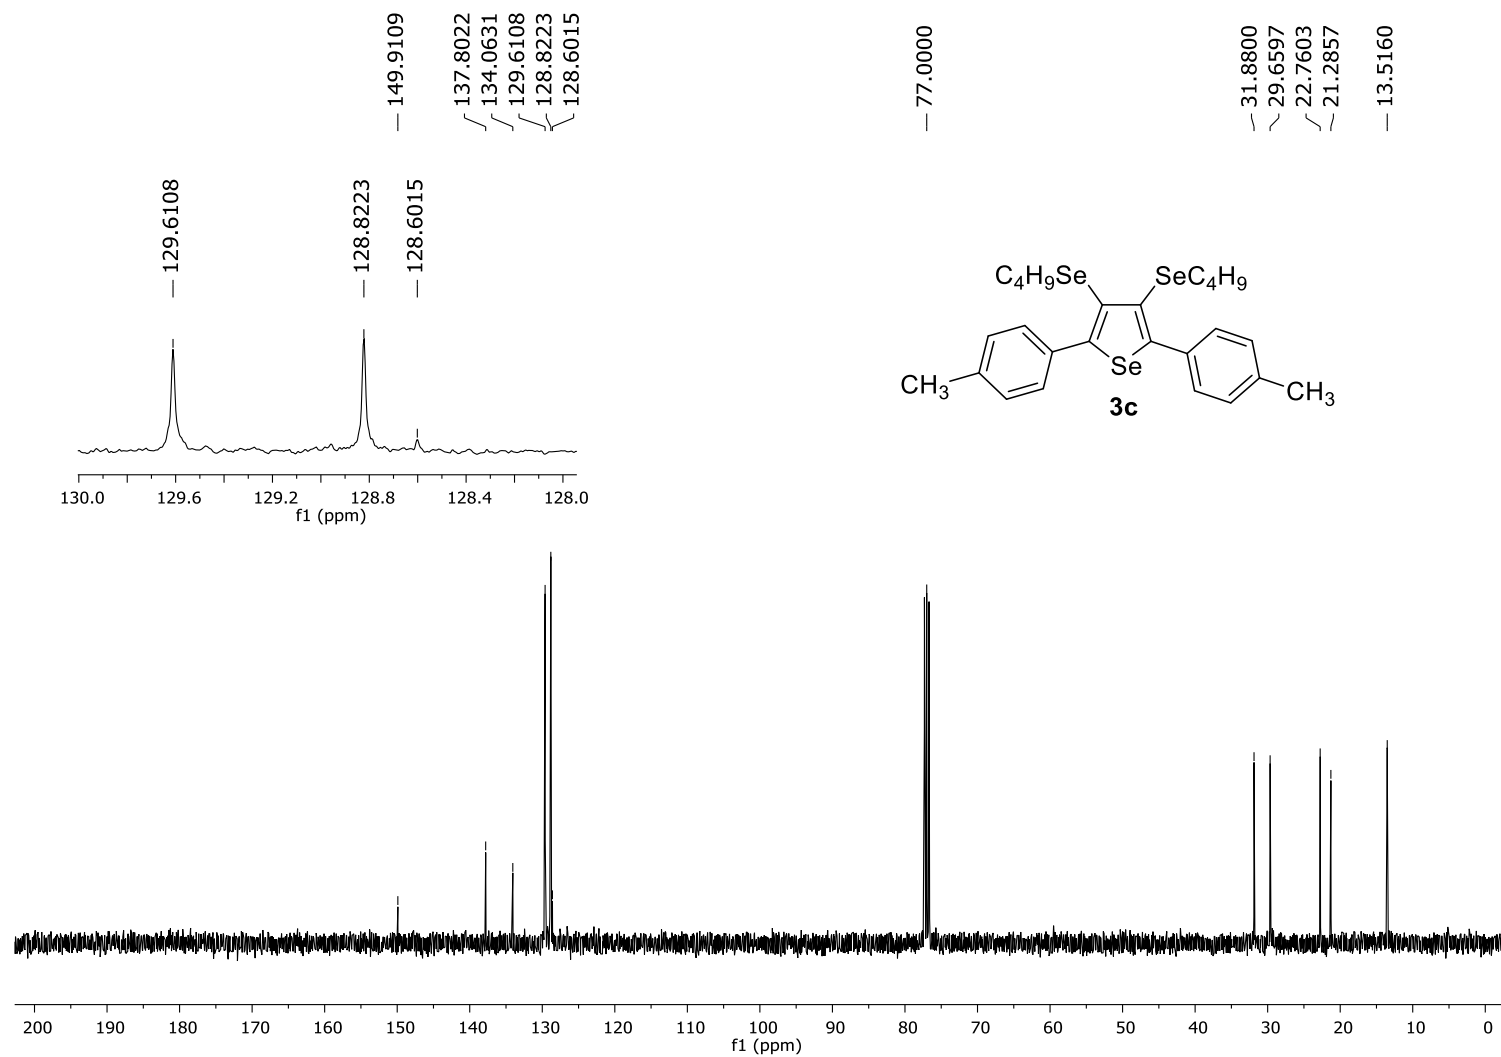

**Figure S7:** <sup>13</sup>C NMR (100 MHz, CDCl<sub>3</sub>) spectrum of compound **3c**.

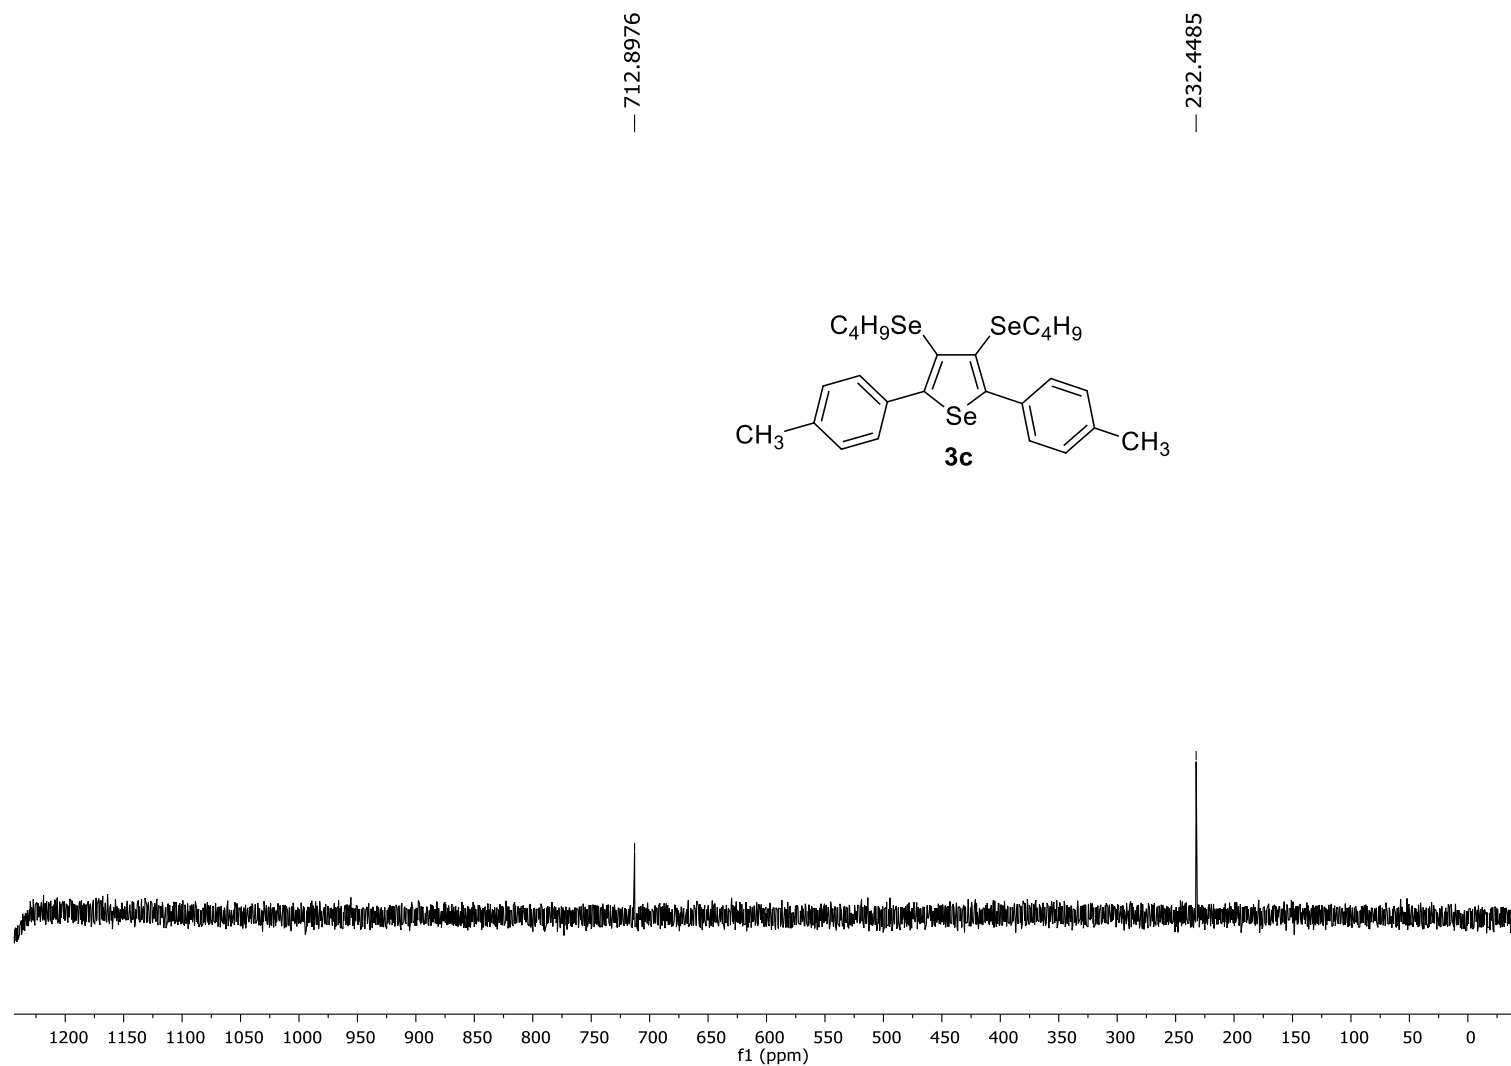

**Figure S8:**  $^{77}\text{Se}$  NMR (76 MHz,  $\text{CDCl}_3$ ) spectrum of compound **3c**.

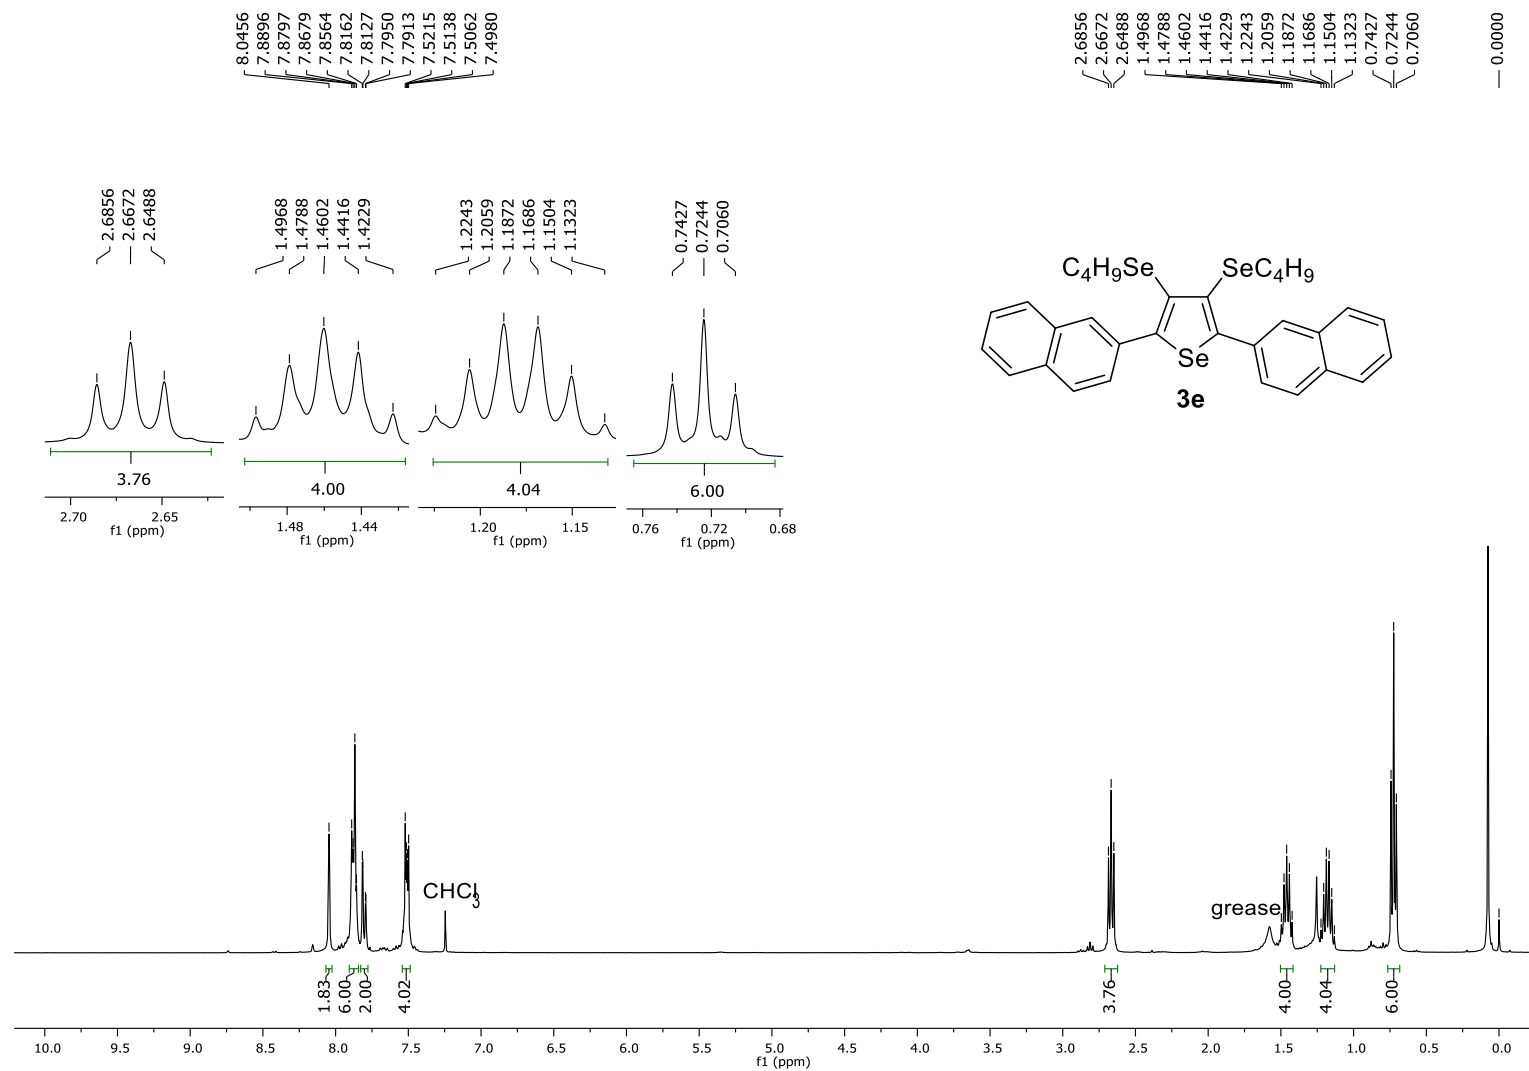

**Figure S9:**  $^1\text{H}$  NMR (400 MHz,  $\text{CDCl}_3$ ) spectrum of compound **3e**.

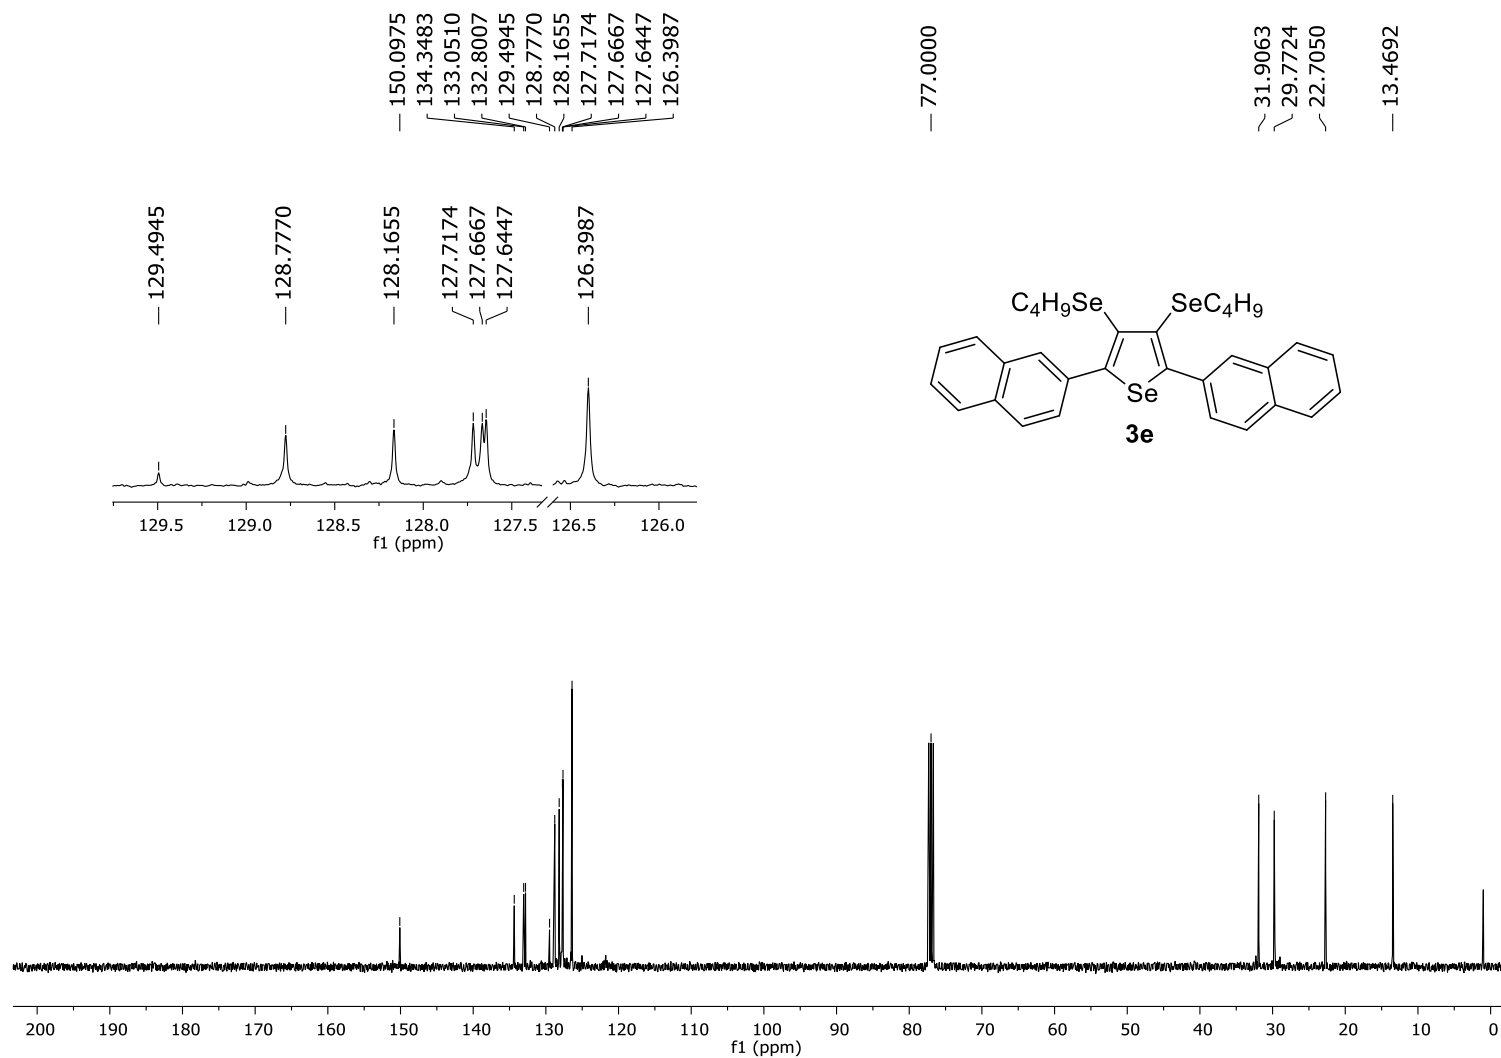

**Figure S10:** <sup>13</sup>C NMR (100 MHz, CDCl<sub>3</sub>) spectrum of compound **3e**.

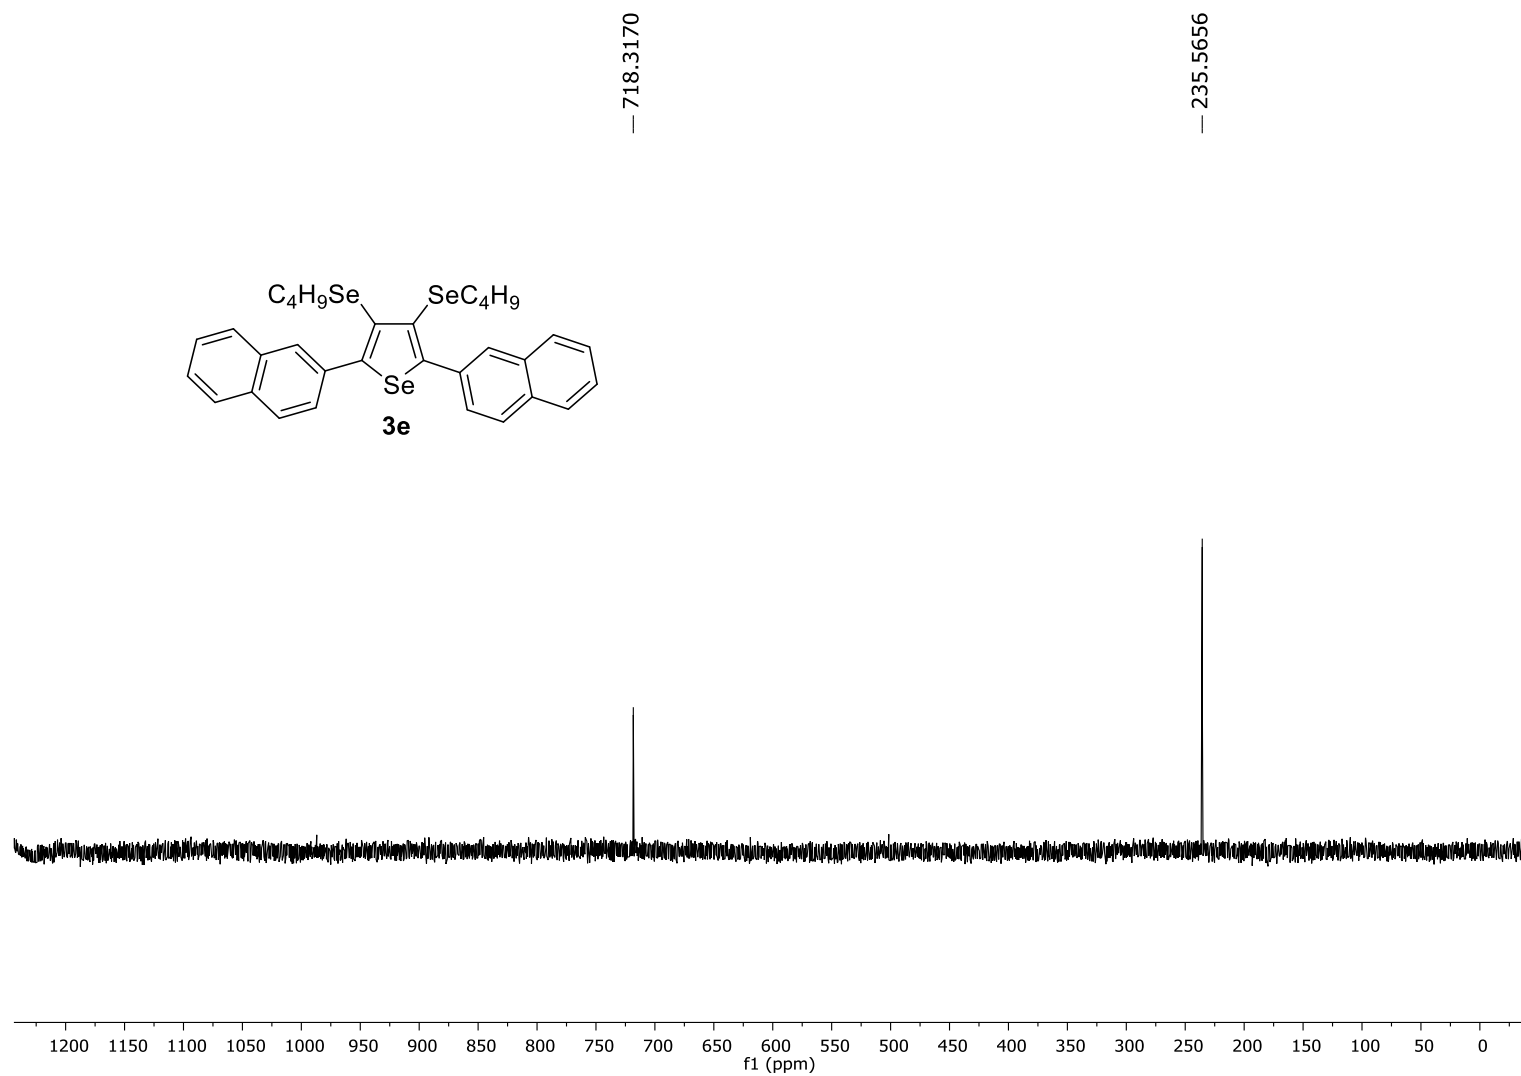

**Figure S11:**  $^{77}\text{Se}$  NMR (76 MHz,  $\text{CDCl}_3$ ) spectrum of compound **3e**.

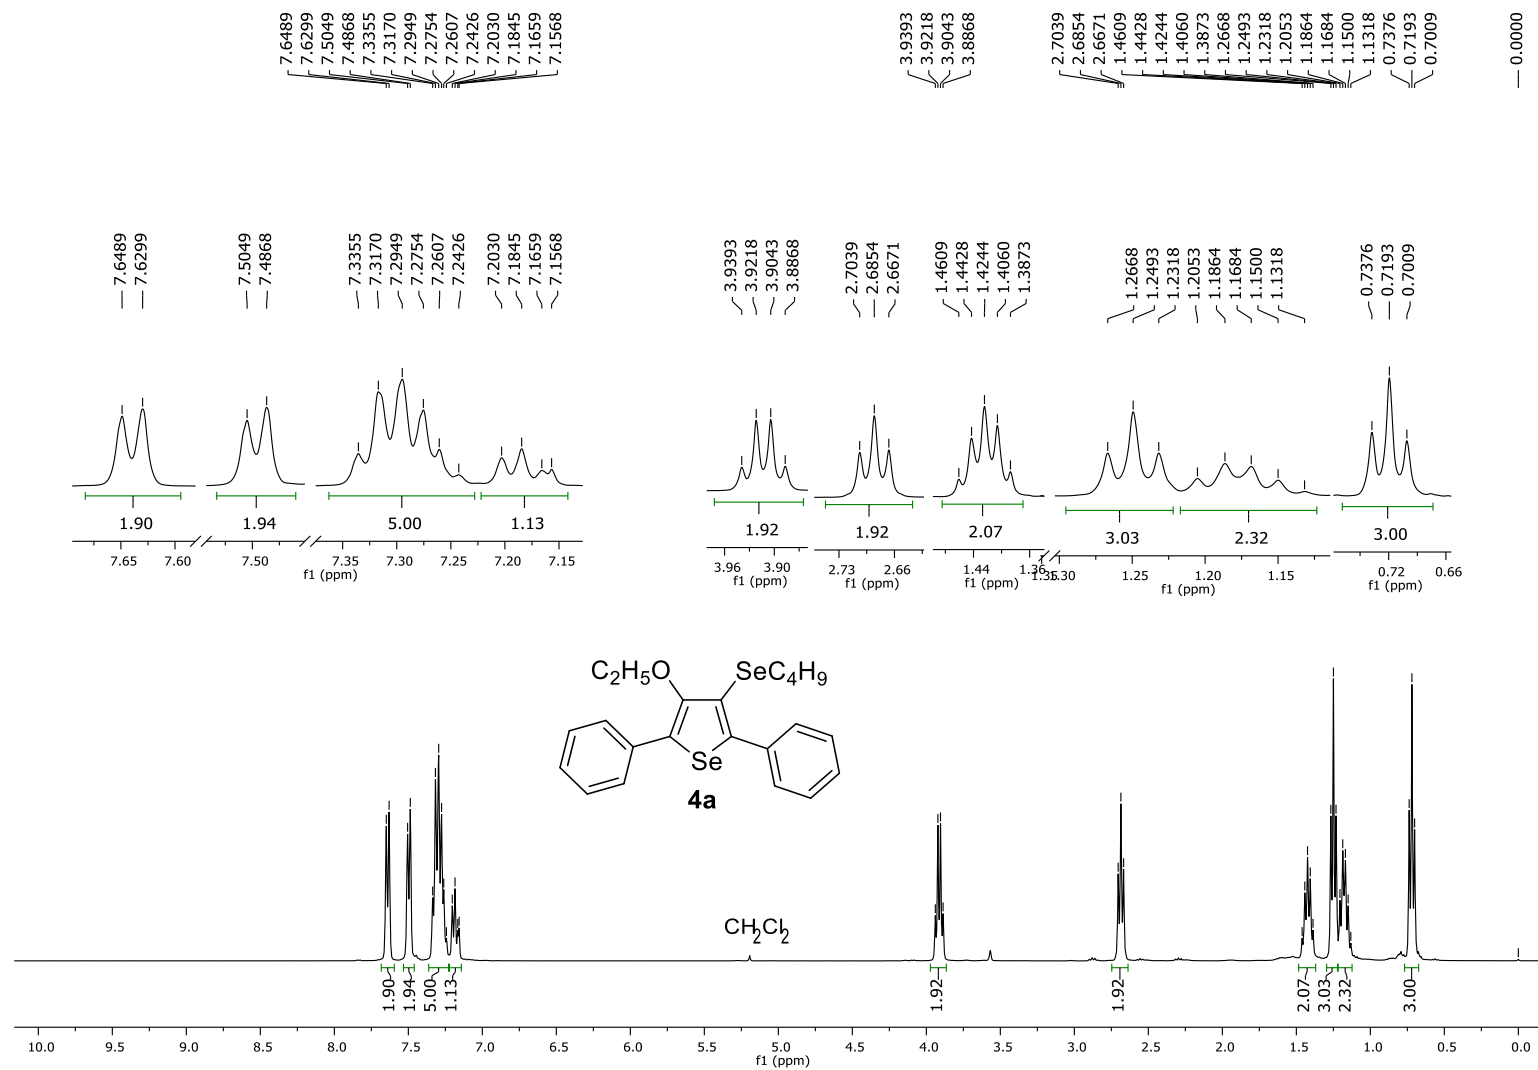

**Figure S12:** <sup>1</sup>H NMR (400 MHz, CDCl<sub>3</sub>) spectrum of compound **4a**.

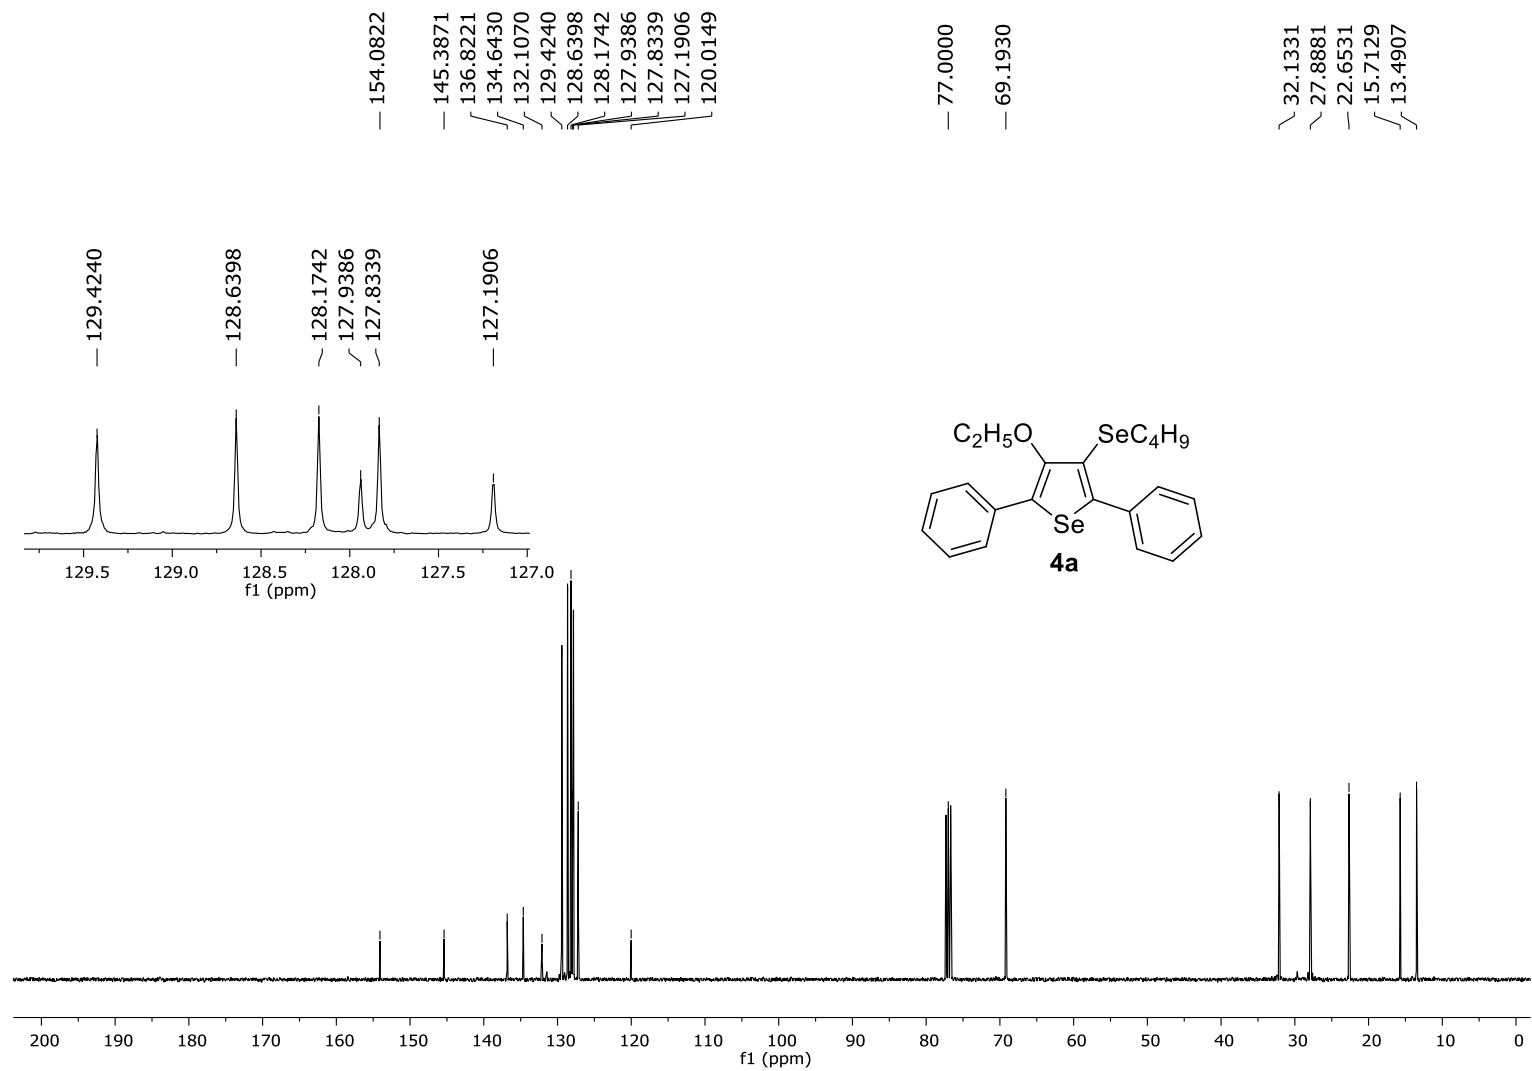

**Figure S13:** <sup>13</sup>C NMR (100 MHz, CDCl<sub>3</sub>) spectrum of compound **4a**.

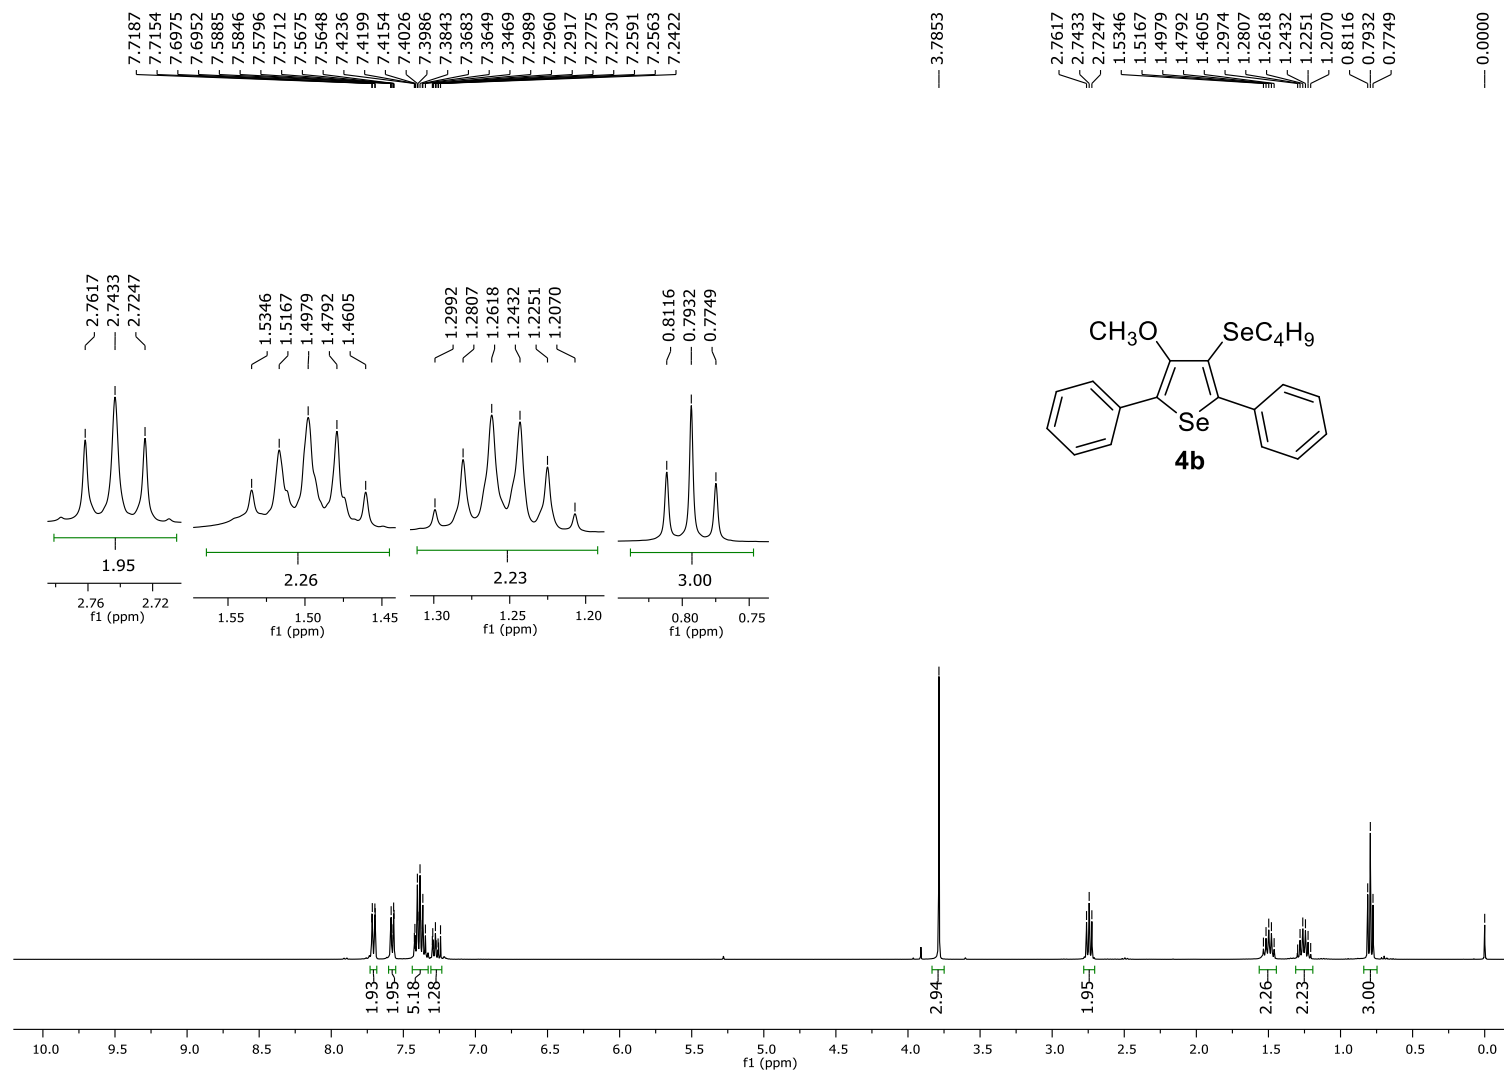

**Figure S14:** <sup>1</sup>H NMR (400 MHz, CDCl<sub>3</sub>) spectrum of compound **4b**.

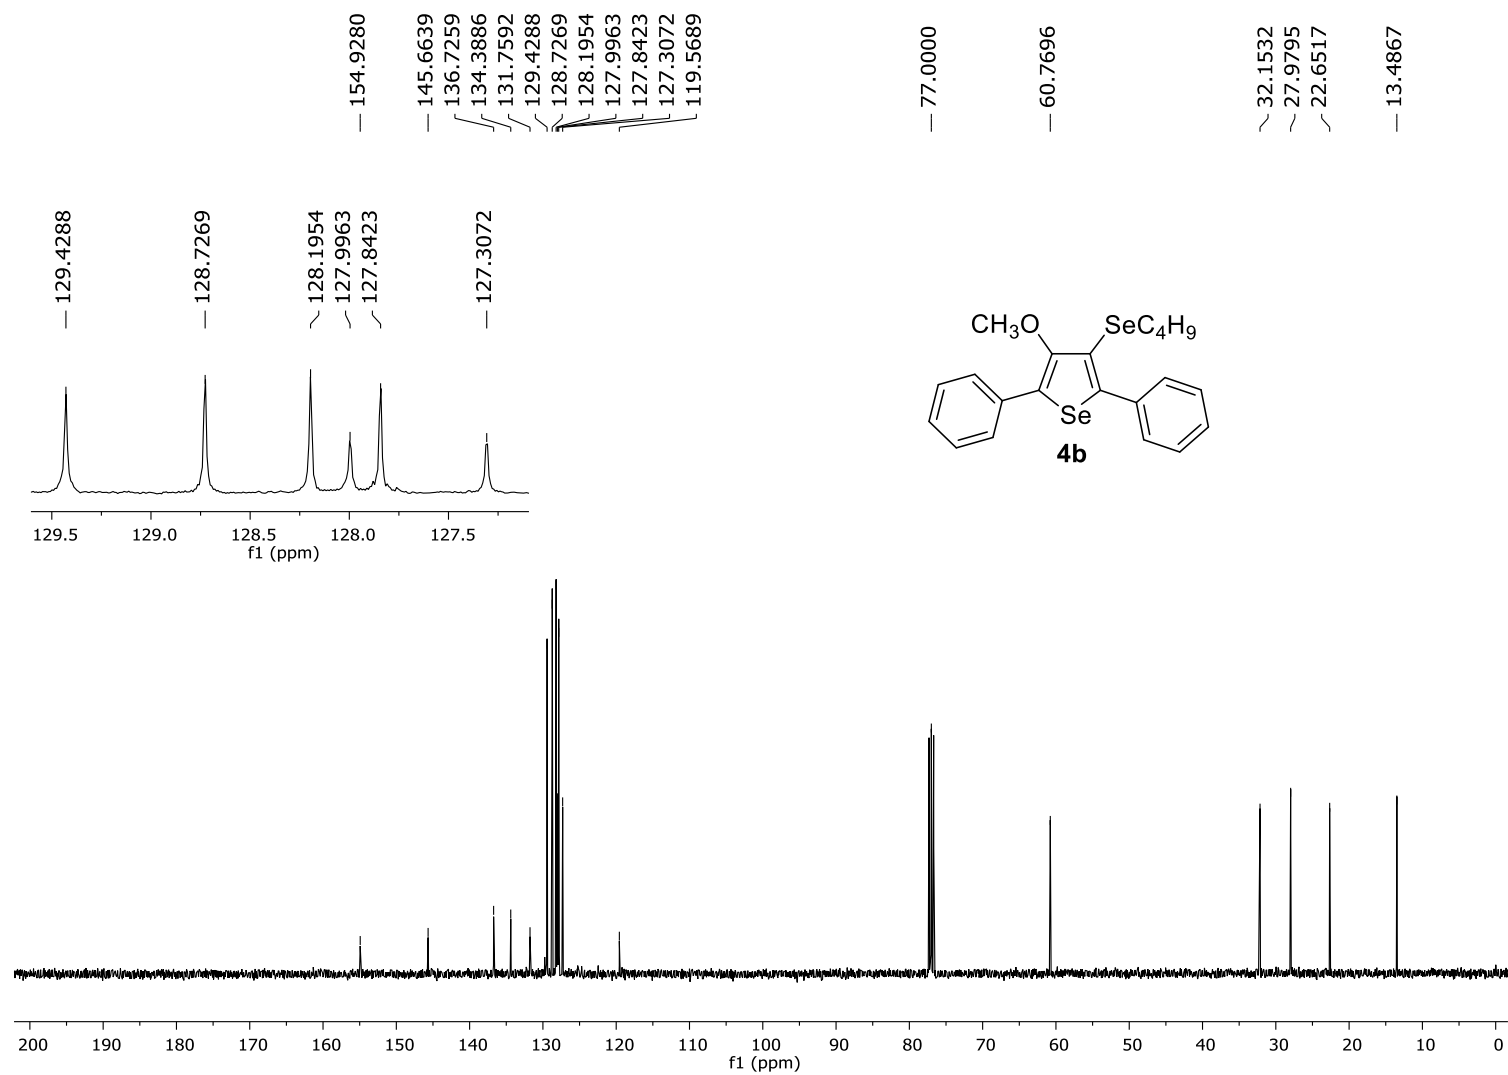

**Figure S15:** <sup>13</sup>C NMR (100 MHz, CDCl<sub>3</sub>) spectrum of compound **4b**.

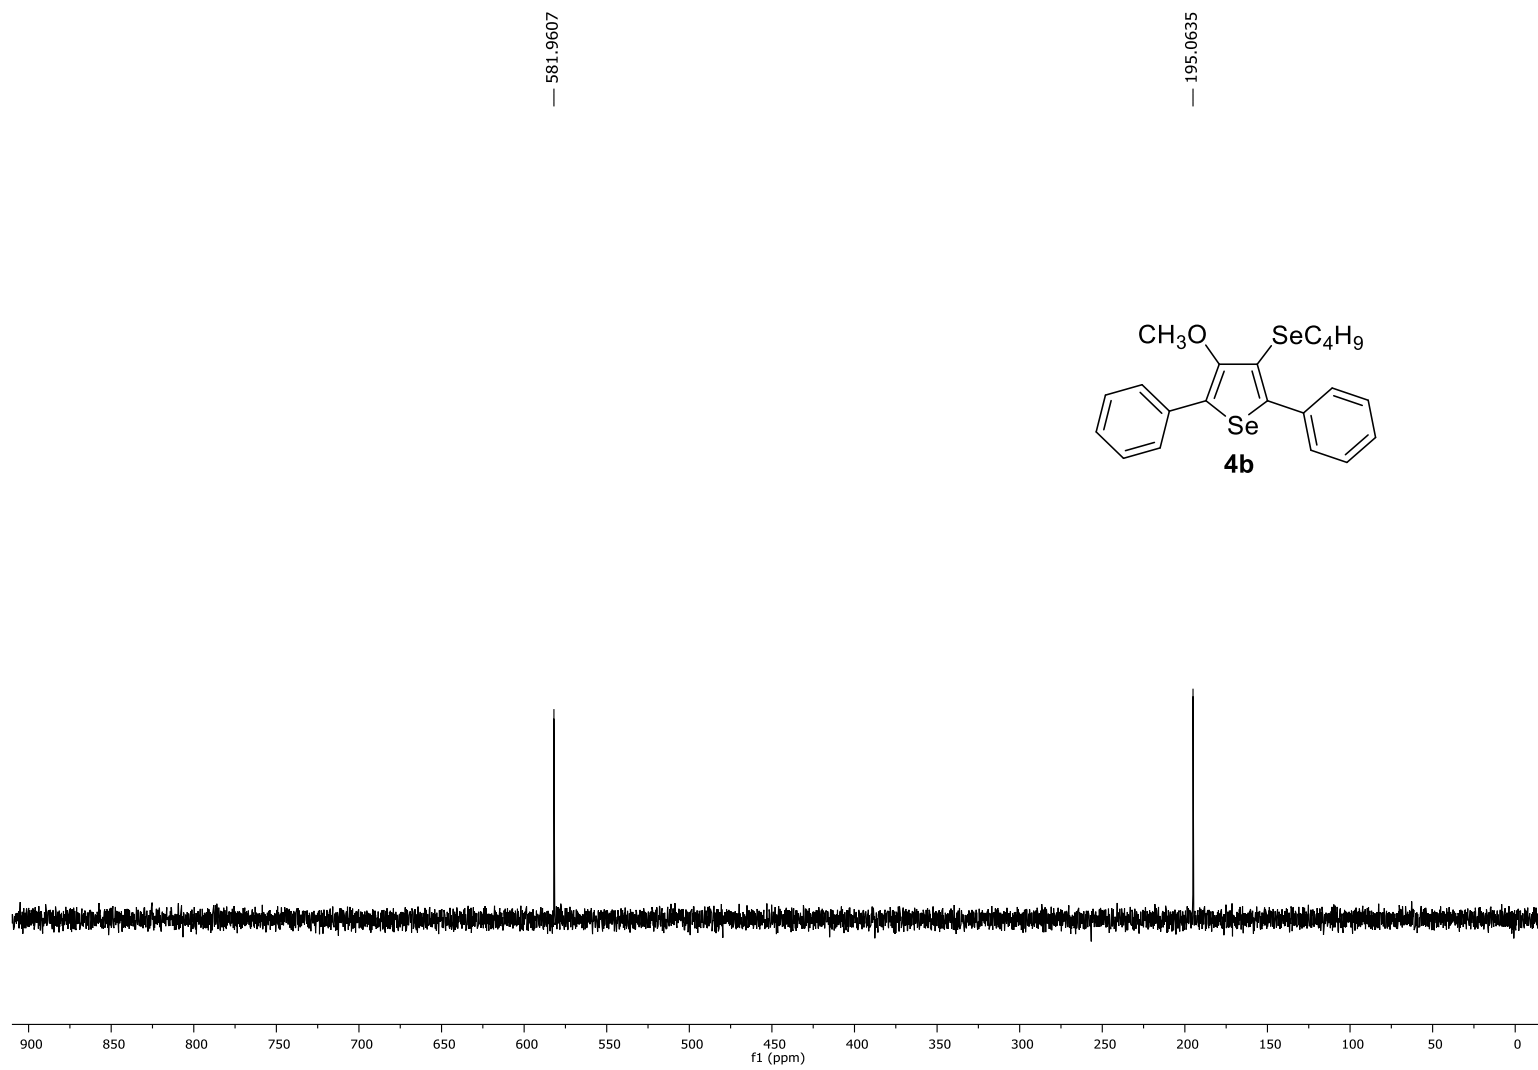

**Figure S16:**  $^{77}\text{Se}$  NMR (76 MHz,  $\text{CDCl}_3$ ) spectrum of compound **4b**.

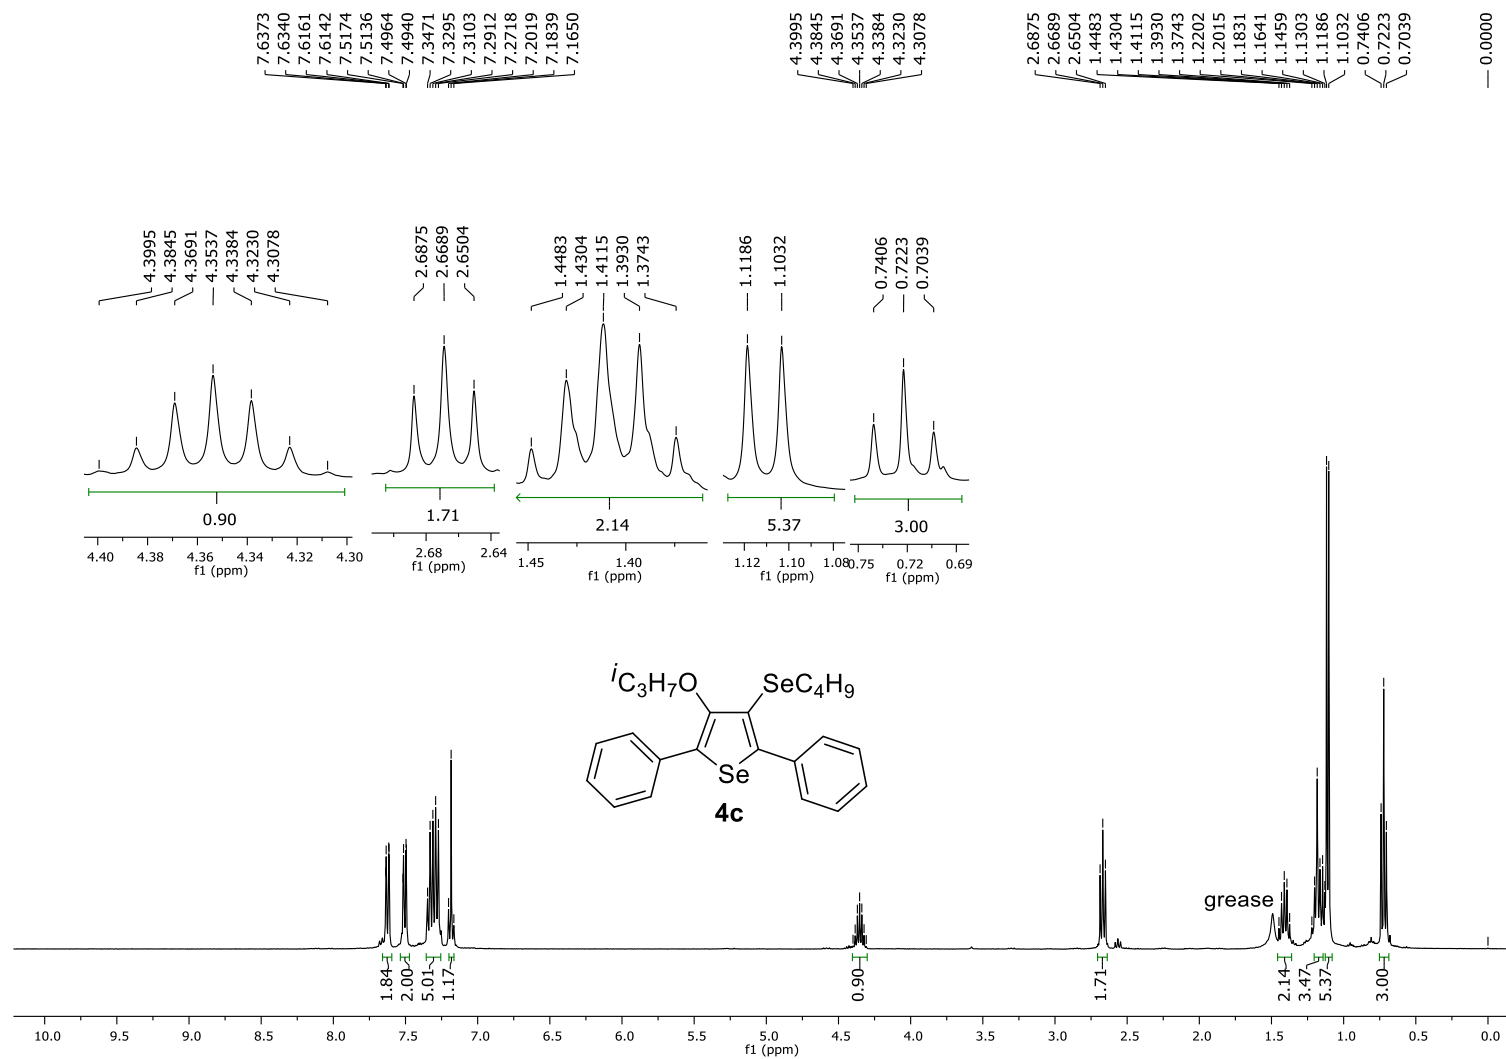

**Figure S17:**  $^1\text{H}$  NMR (400 MHz,  $\text{CDCl}_3$ ) spectrum of compound **4c**.

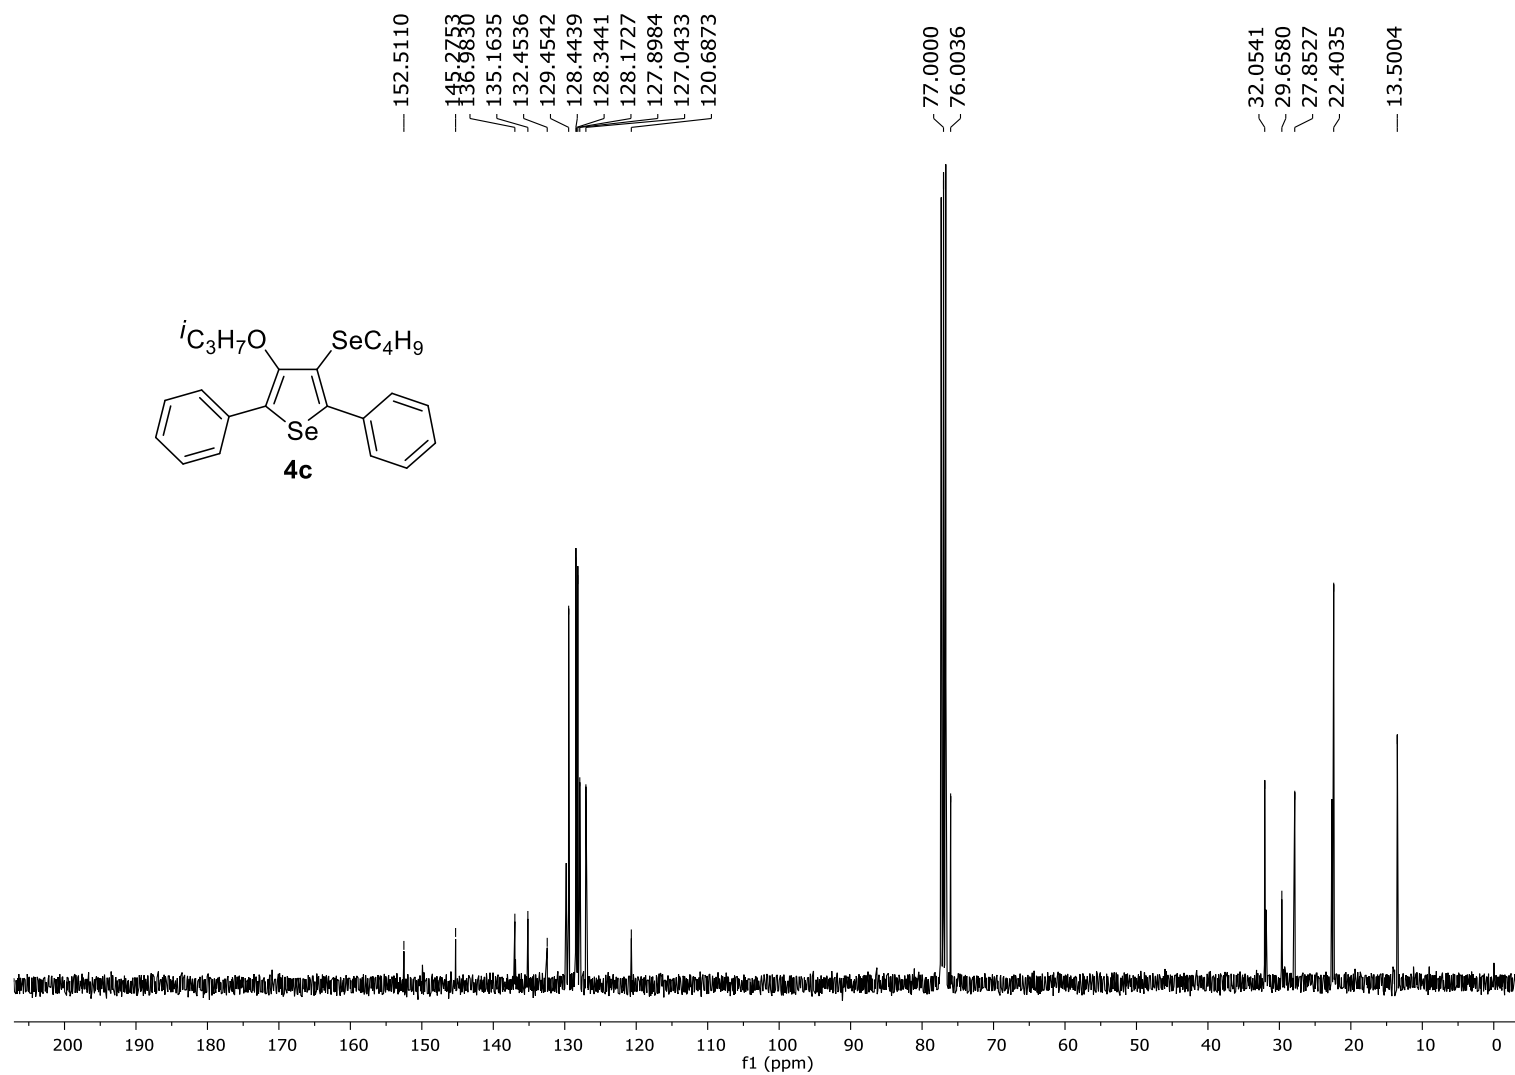

**Figure S18:** <sup>13</sup>C NMR (100 MHz, CDCl<sub>3</sub>) spectrum of compound **4c**.

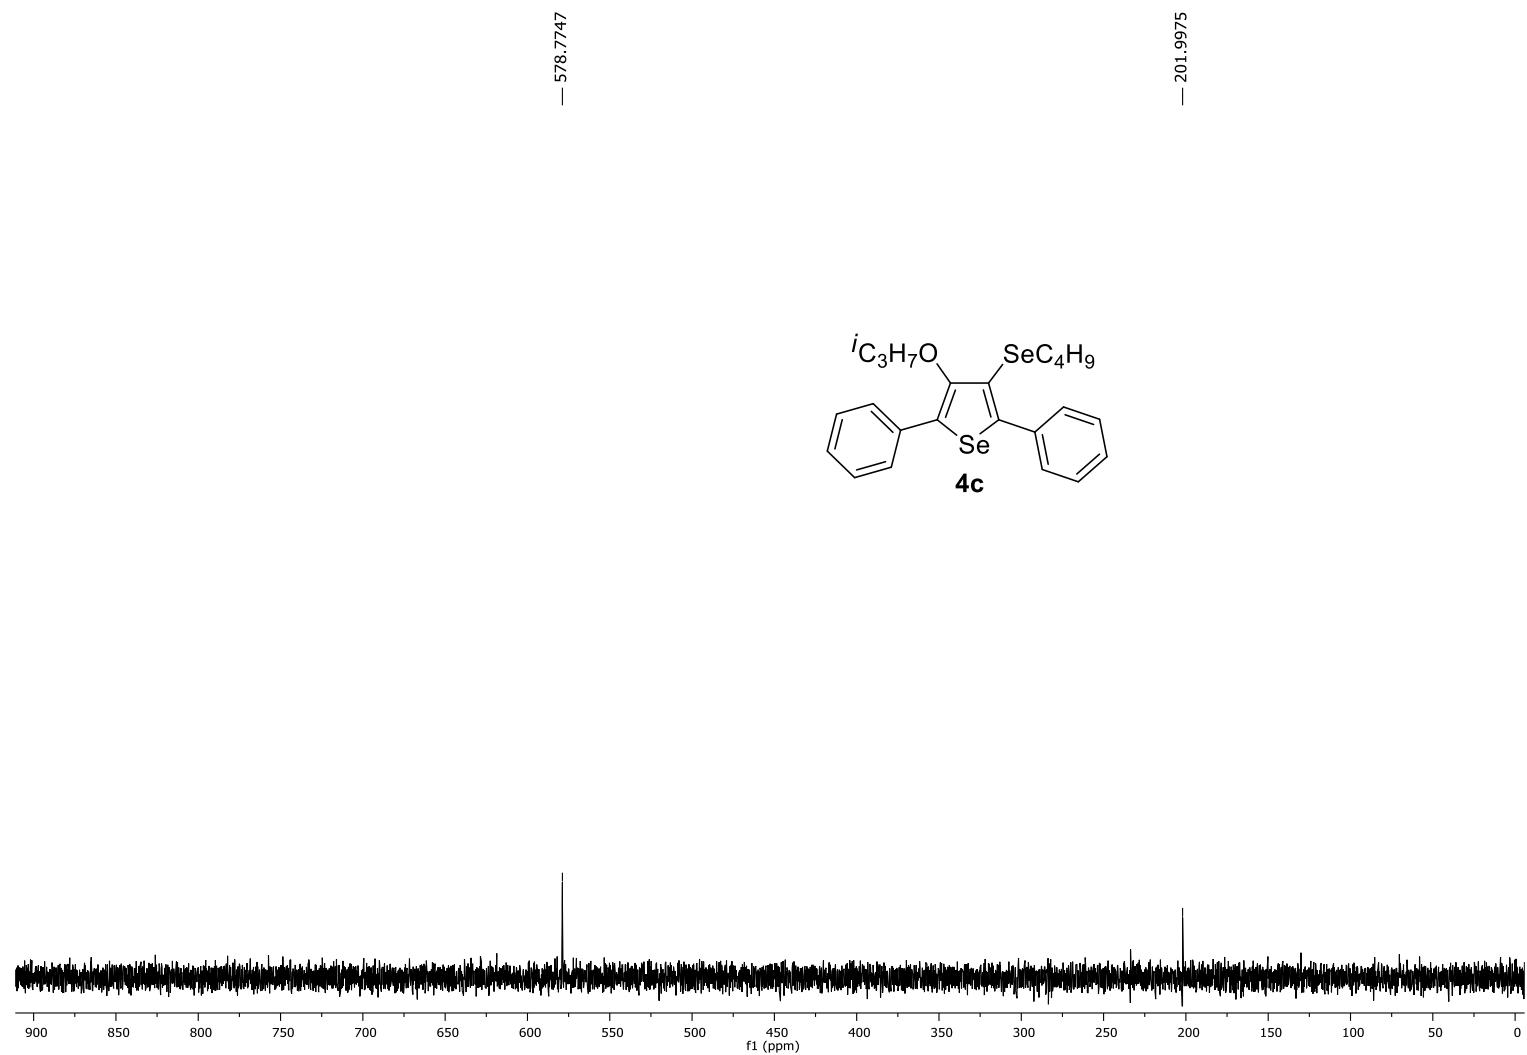

**Figure S19:**  $^{77}\text{Se}$  NMR (76 MHz,  $\text{CDCl}_3$ ) spectrum of compound **4c**.

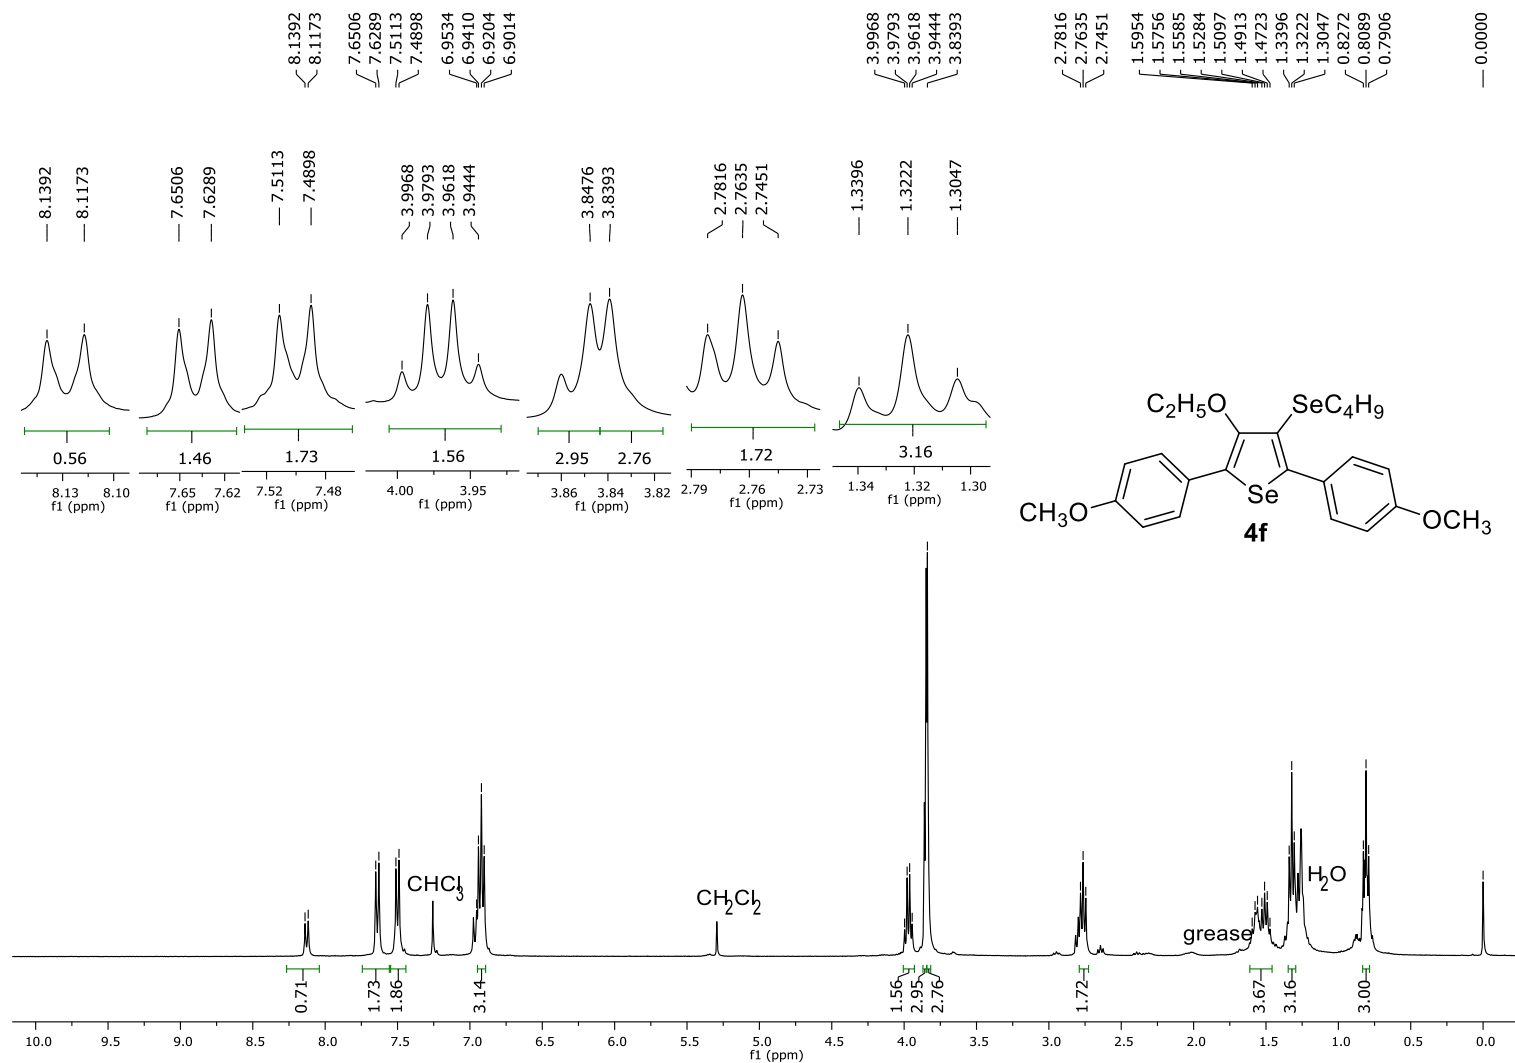

**Figure S20:** <sup>1</sup>H NMR (400 MHz, CDCl<sub>3</sub>) spectrum of compound **4f**.

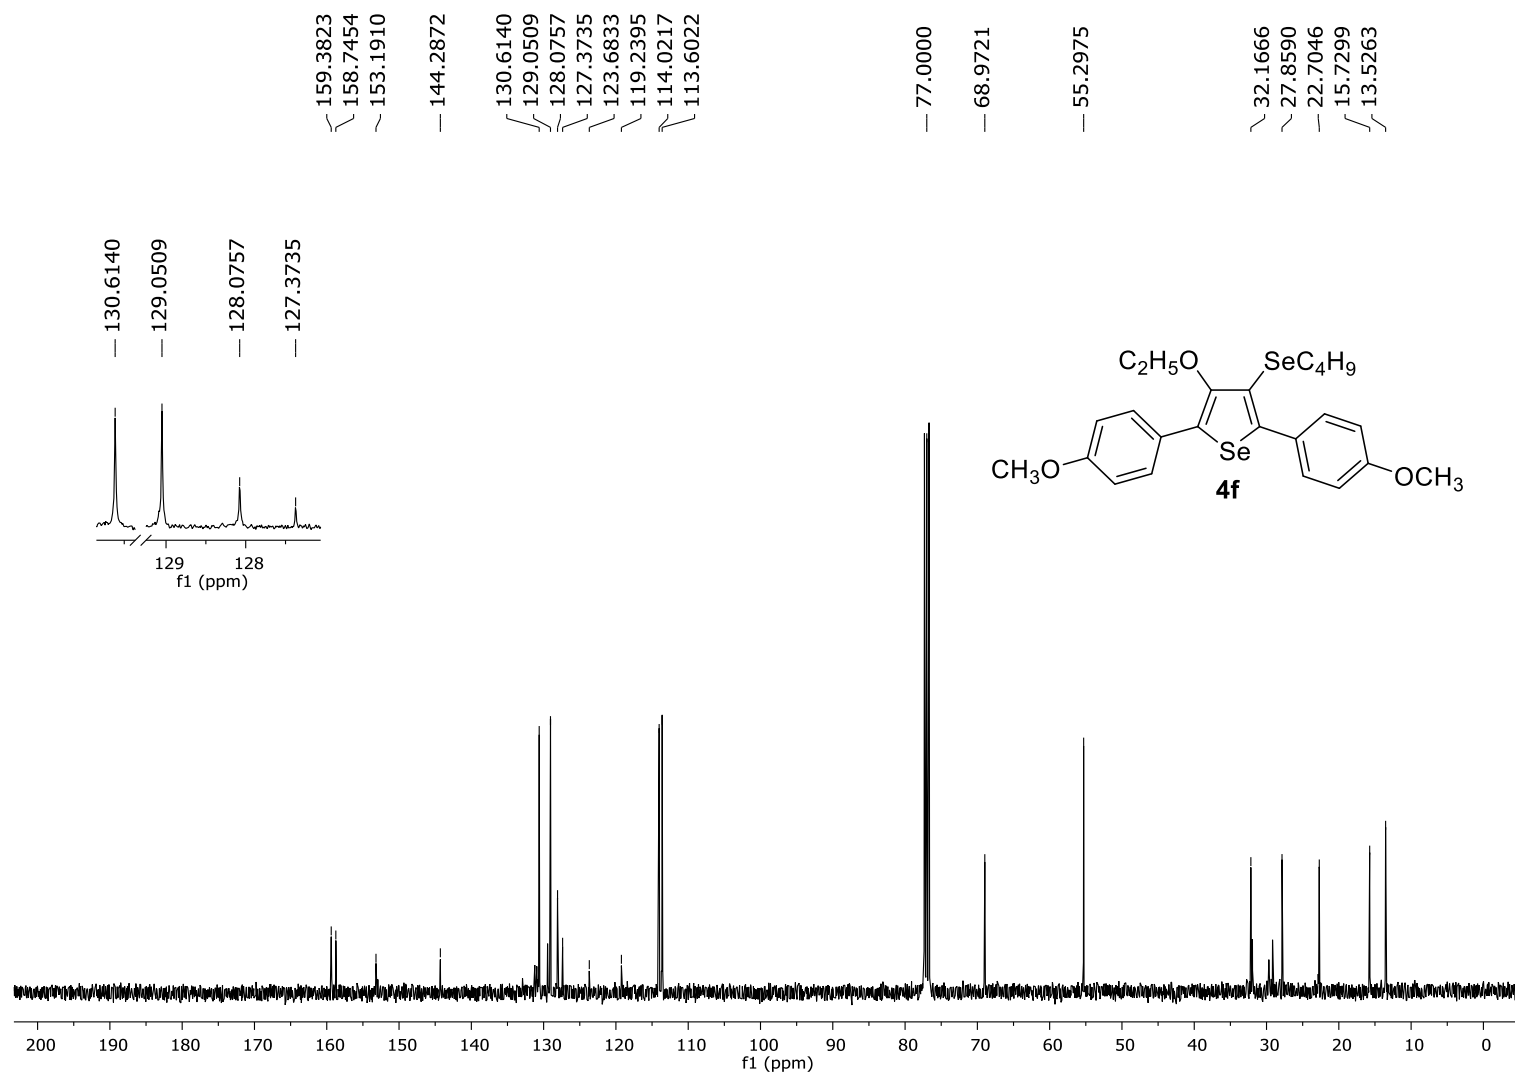

**Figure S21:** <sup>13</sup>C NMR (100 MHz, CDCl<sub>3</sub>) spectrum of compound **4f**.

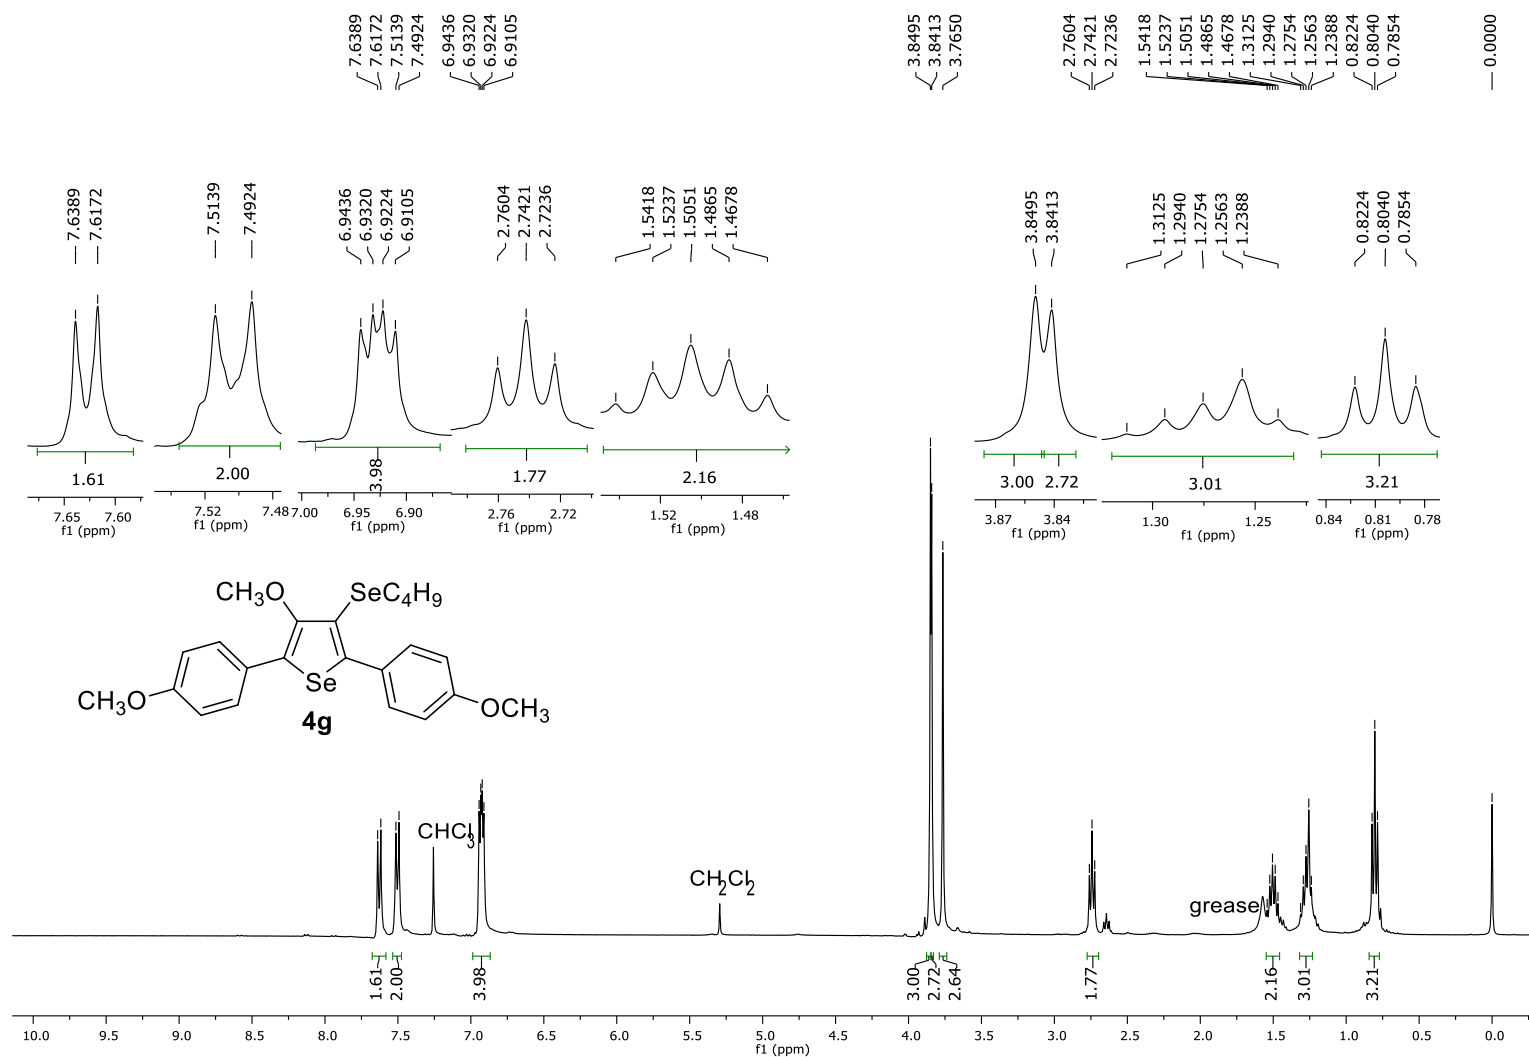

**Figure S22:** <sup>1</sup>H NMR (400 MHz, CDCl<sub>3</sub>) spectrum of compound **4g**.

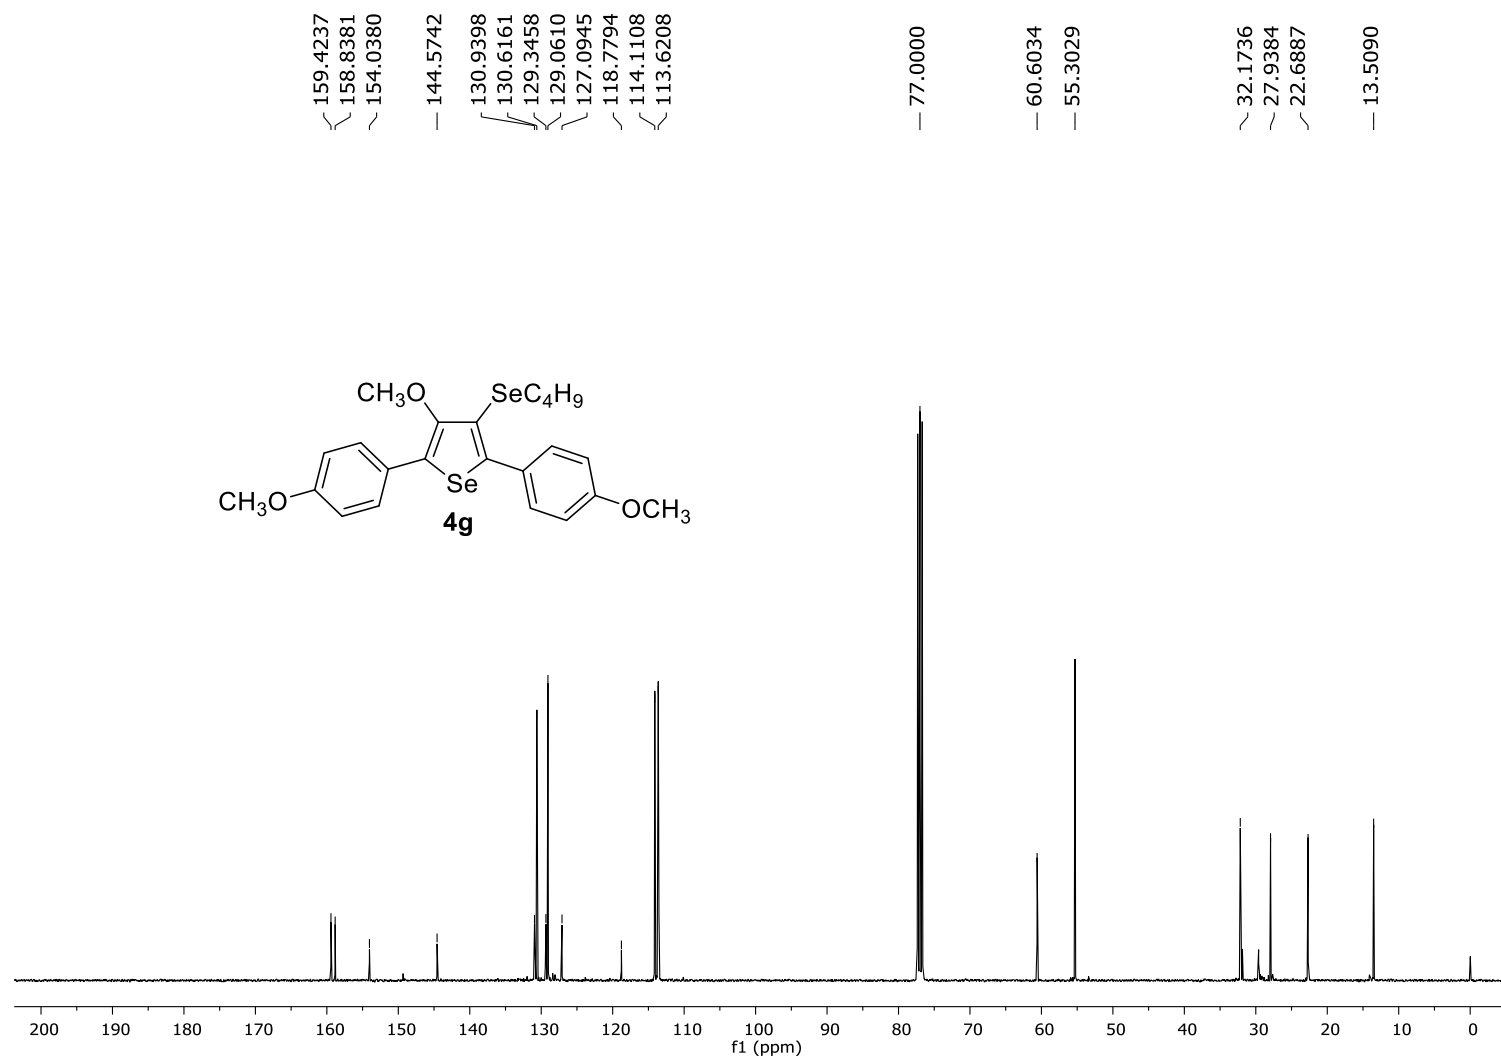

**Figure S23:** <sup>13</sup>C NMR (100 MHz, CDCl<sub>3</sub>) spectrum of compound **4g**.

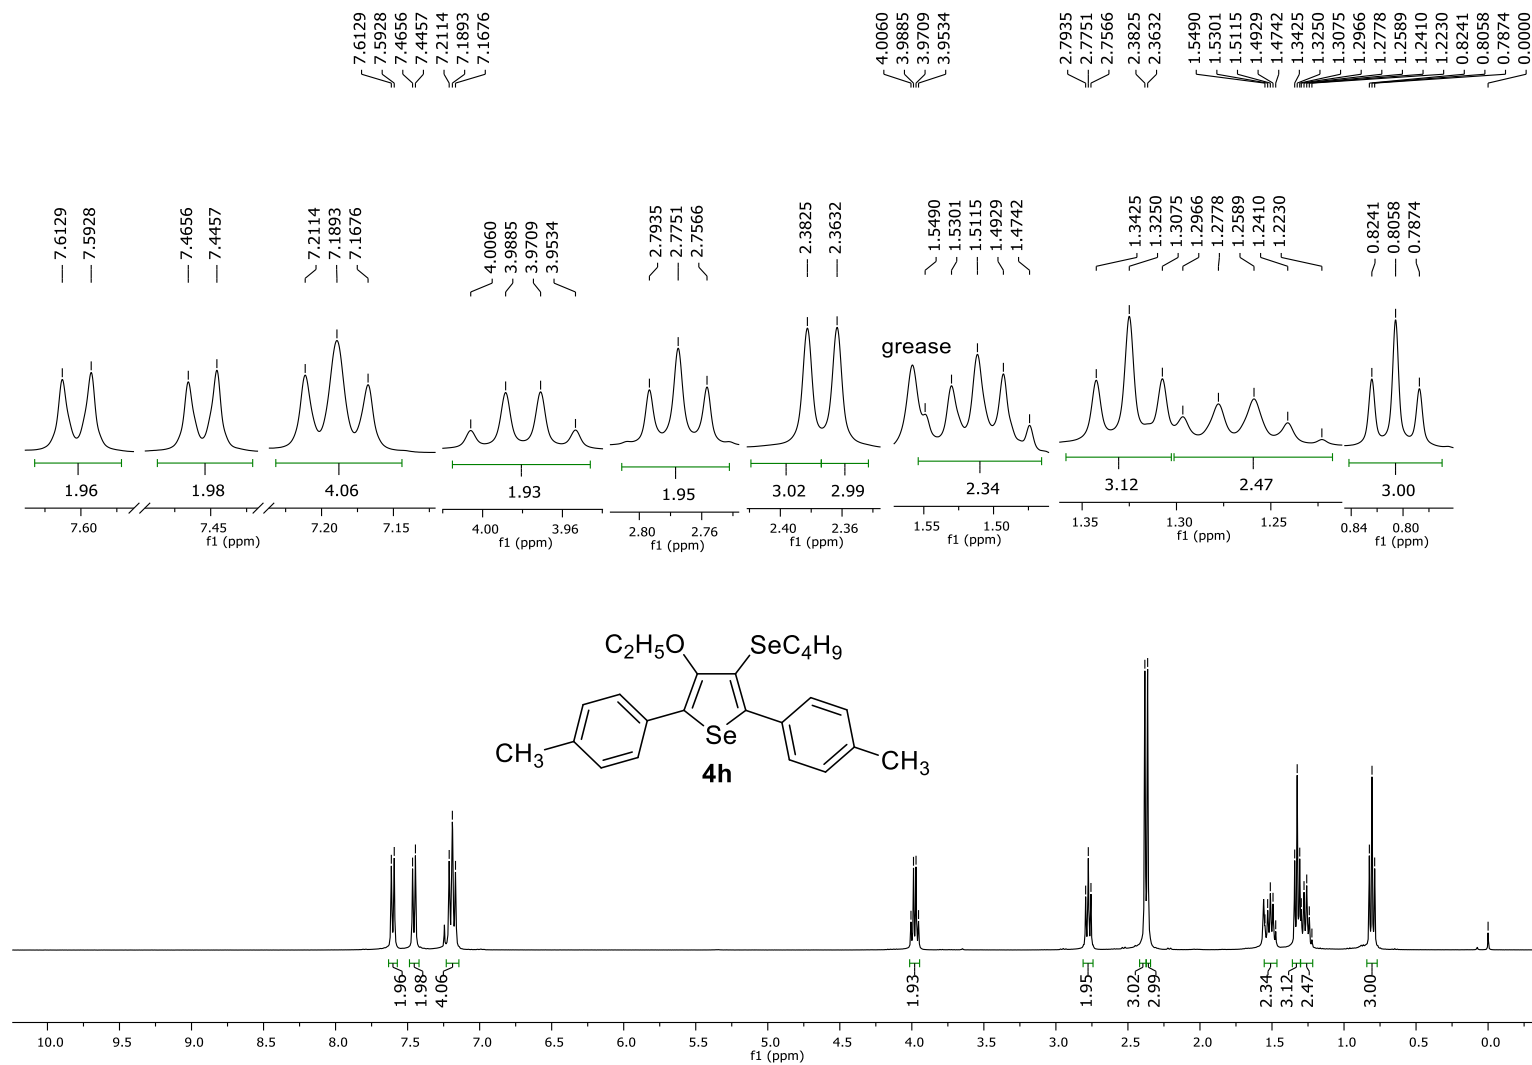

**Figure S24:**  $^1\text{H}$  NMR (400 MHz,  $\text{CDCl}_3$ ) spectrum of compound **4h**.

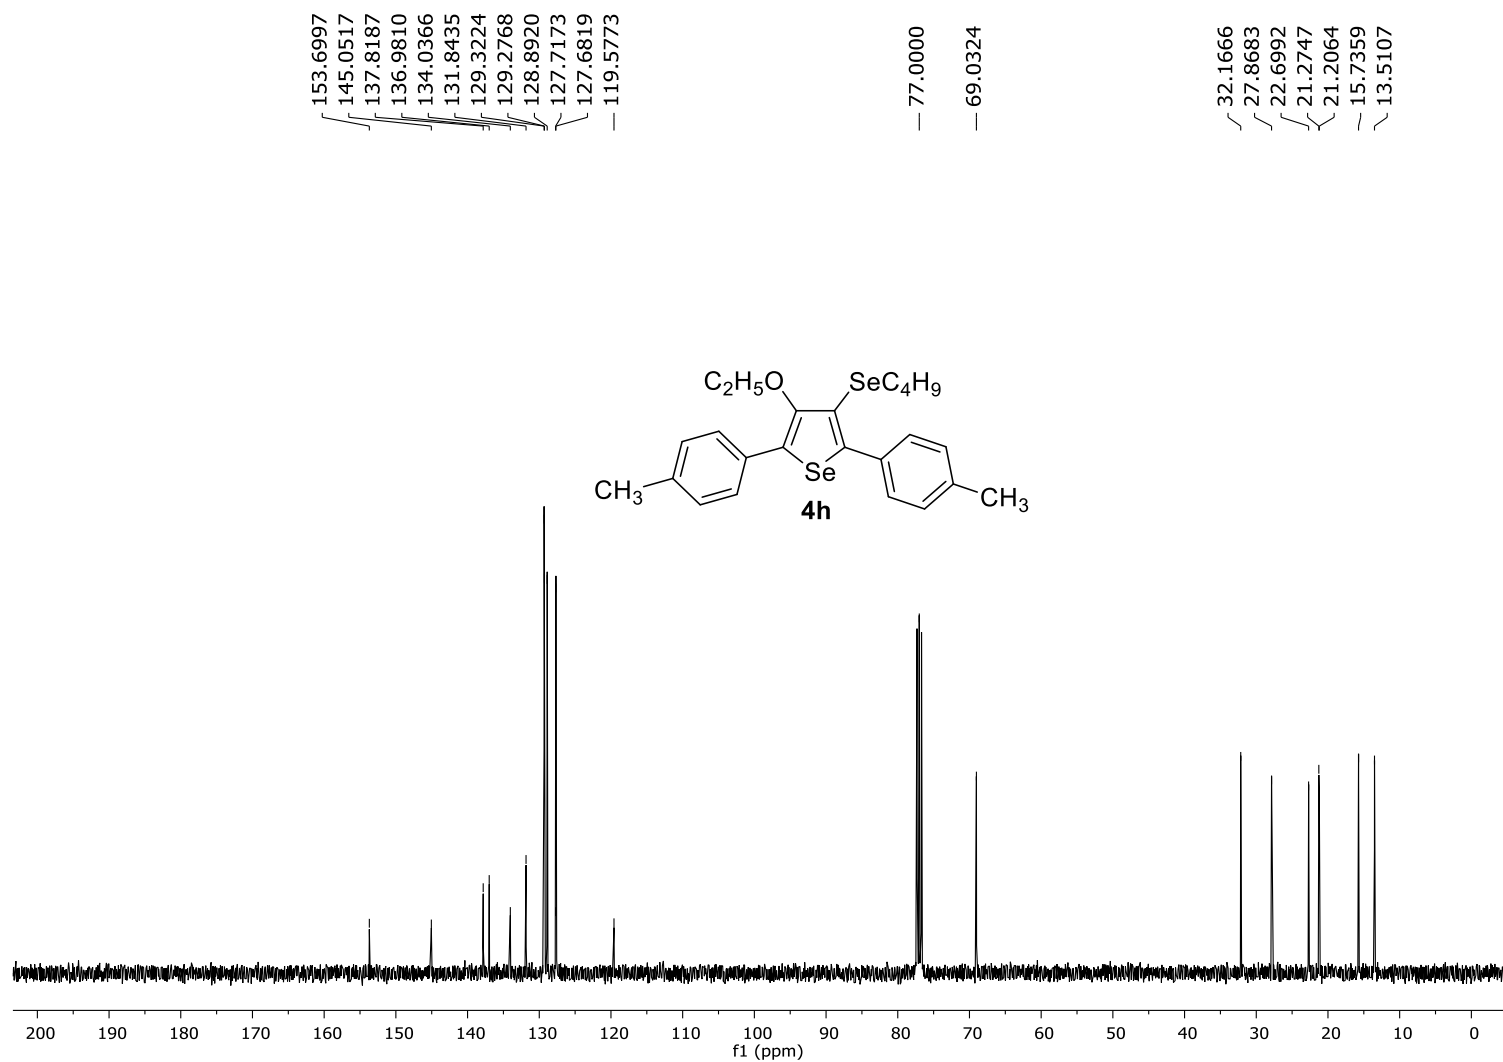

**Figure S25:** <sup>13</sup>C NMR (100 MHz, CDCl<sub>3</sub>) spectrum of compound **4h**.

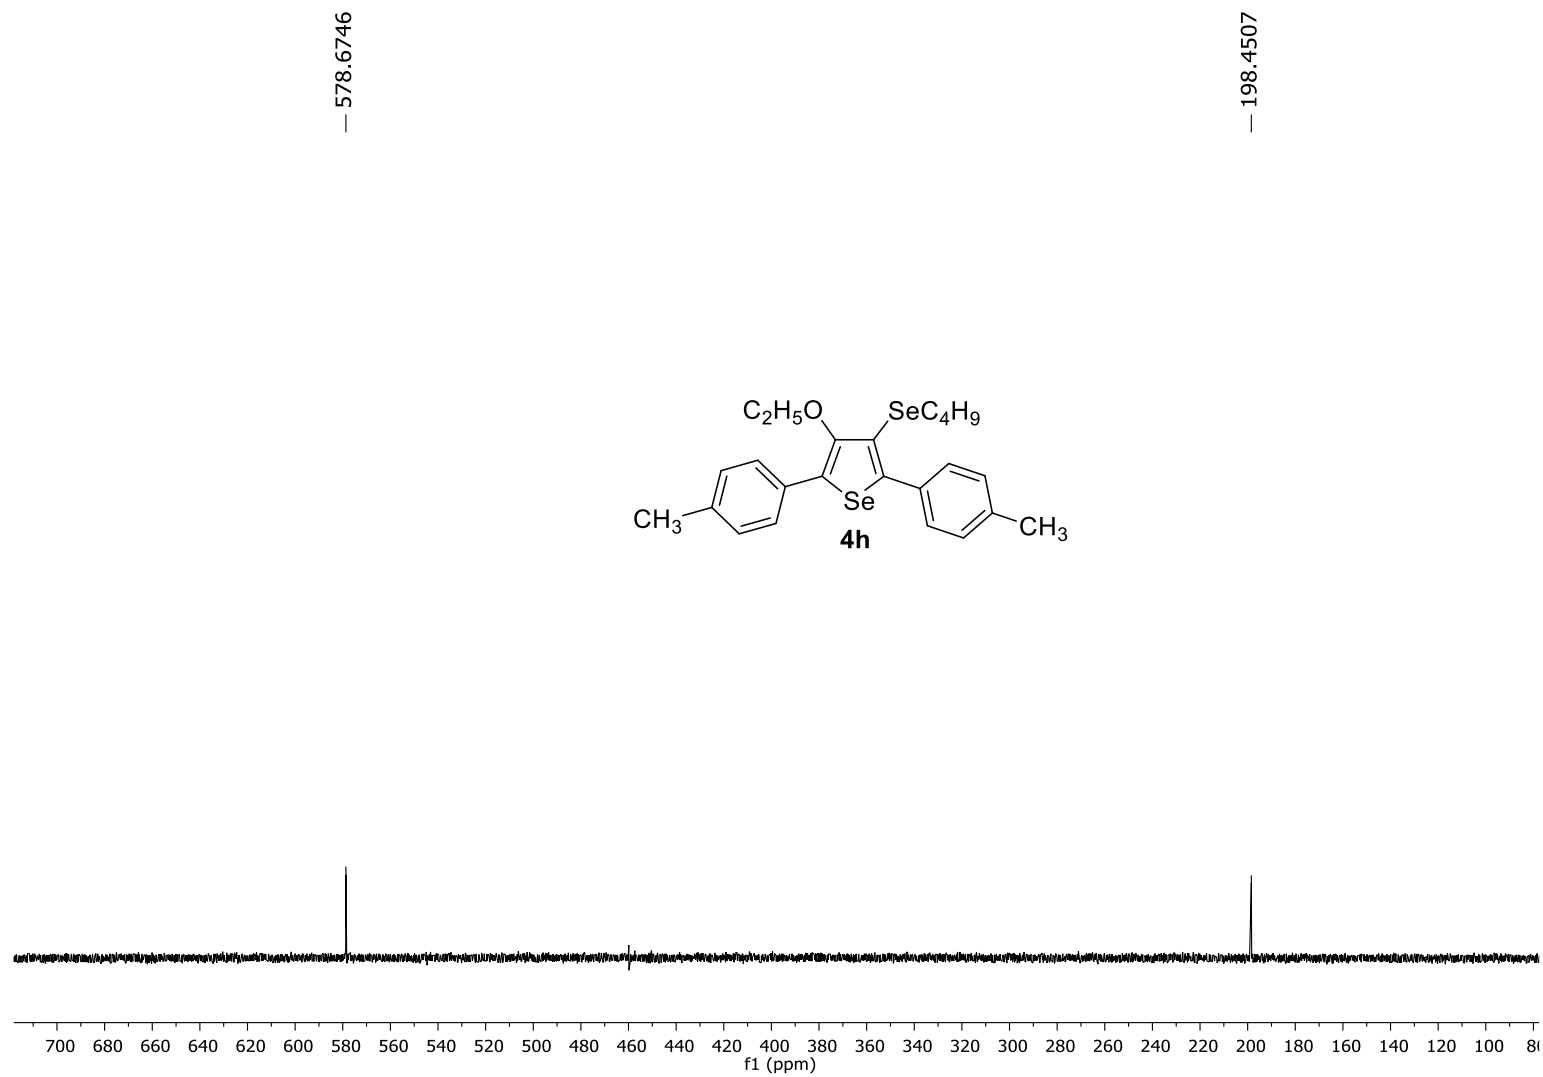

**Figure S26:**  $^{77}\text{Se}$  NMR (76 MHz,  $\text{CDCl}_3$ ) spectrum of compound **4h**.

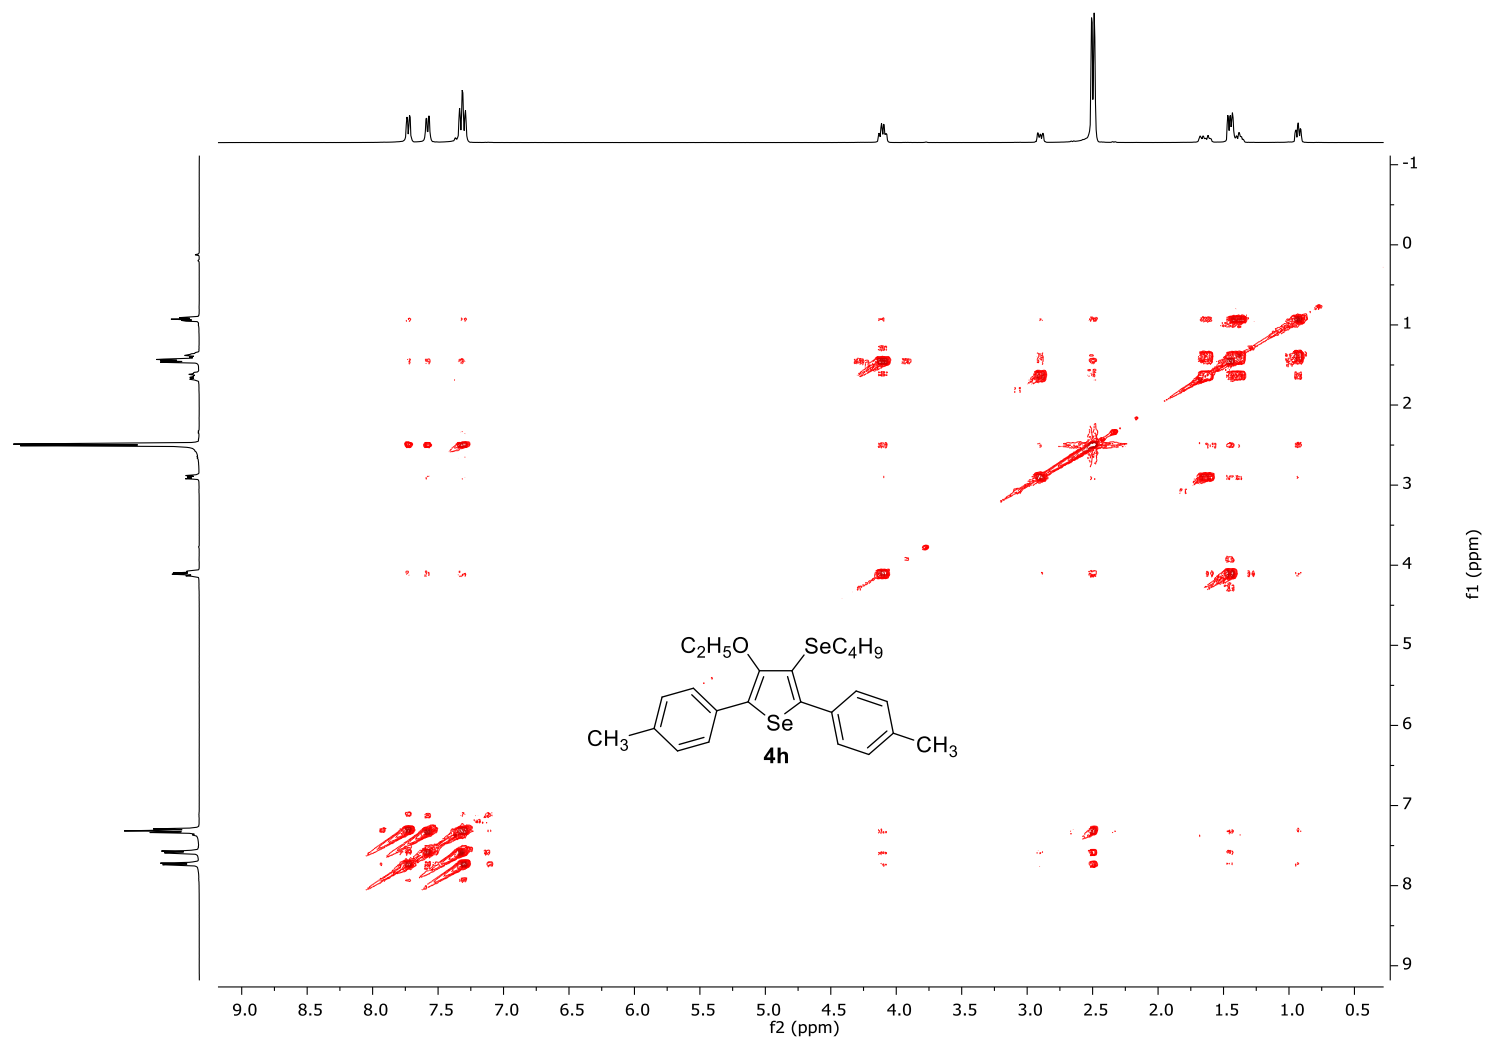

**Figure S27:** COSY NMR-2D (400 MHz,  $\text{CDCl}_3$ ) spectrum of compound **4h**.

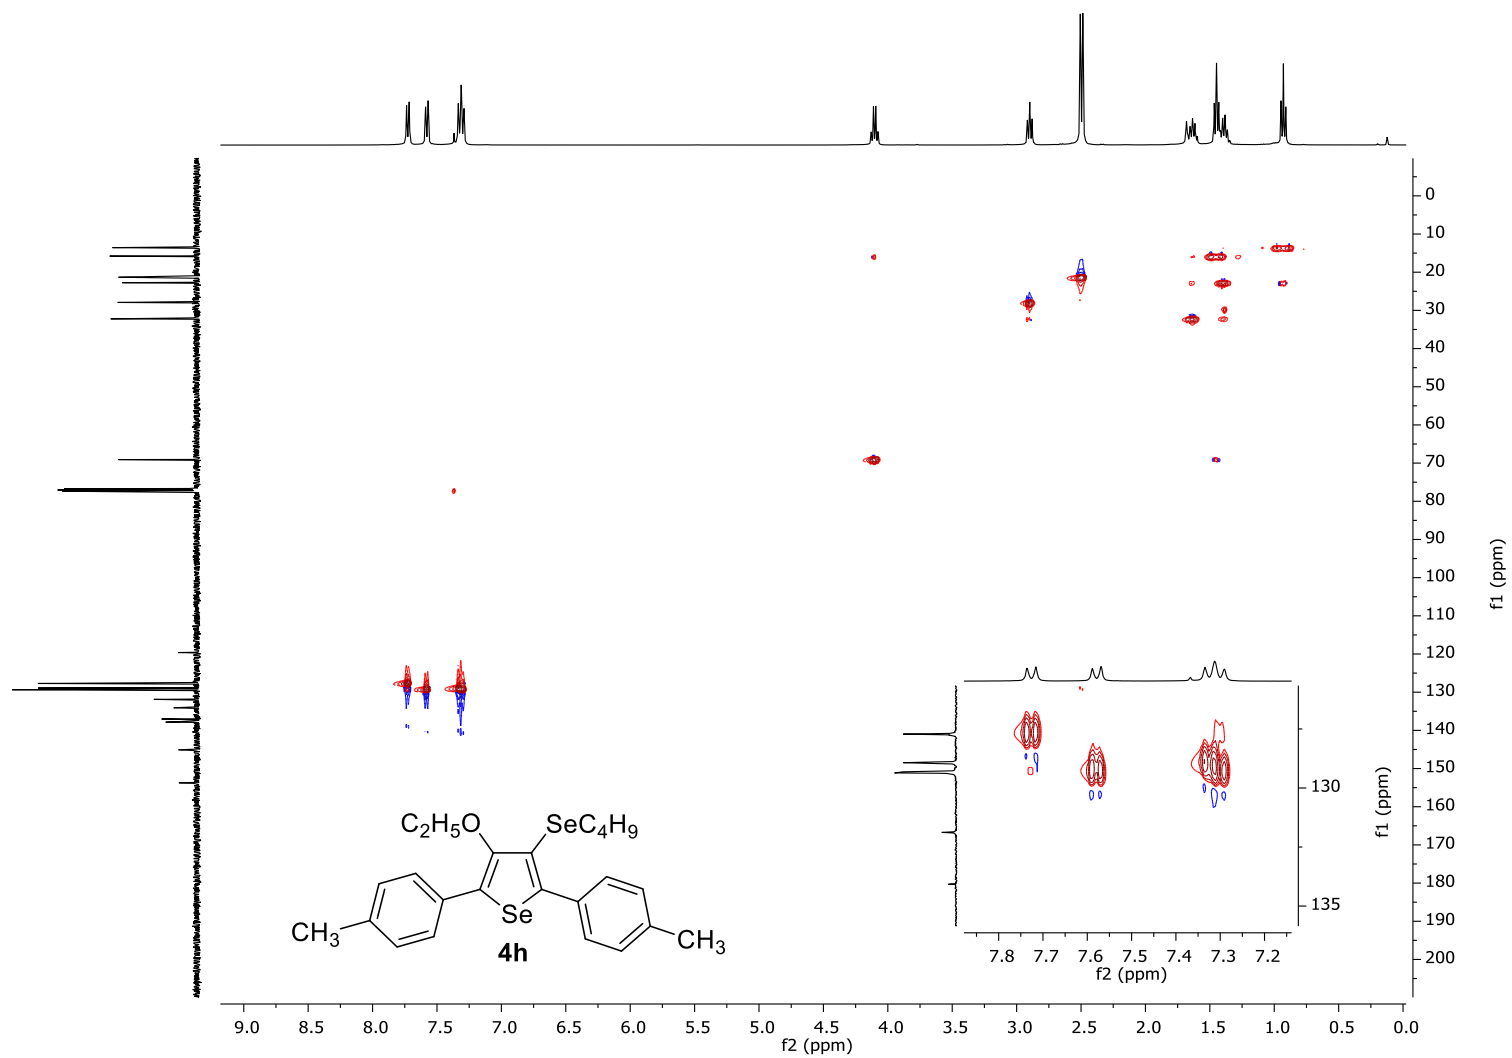

**Figure S28:**  $^1\text{H}$ - $^{13}\text{C}$  HSQC NMR-2D (400 MHz,  $\text{CDCl}_3$ ) spectrum of compound **4h**.

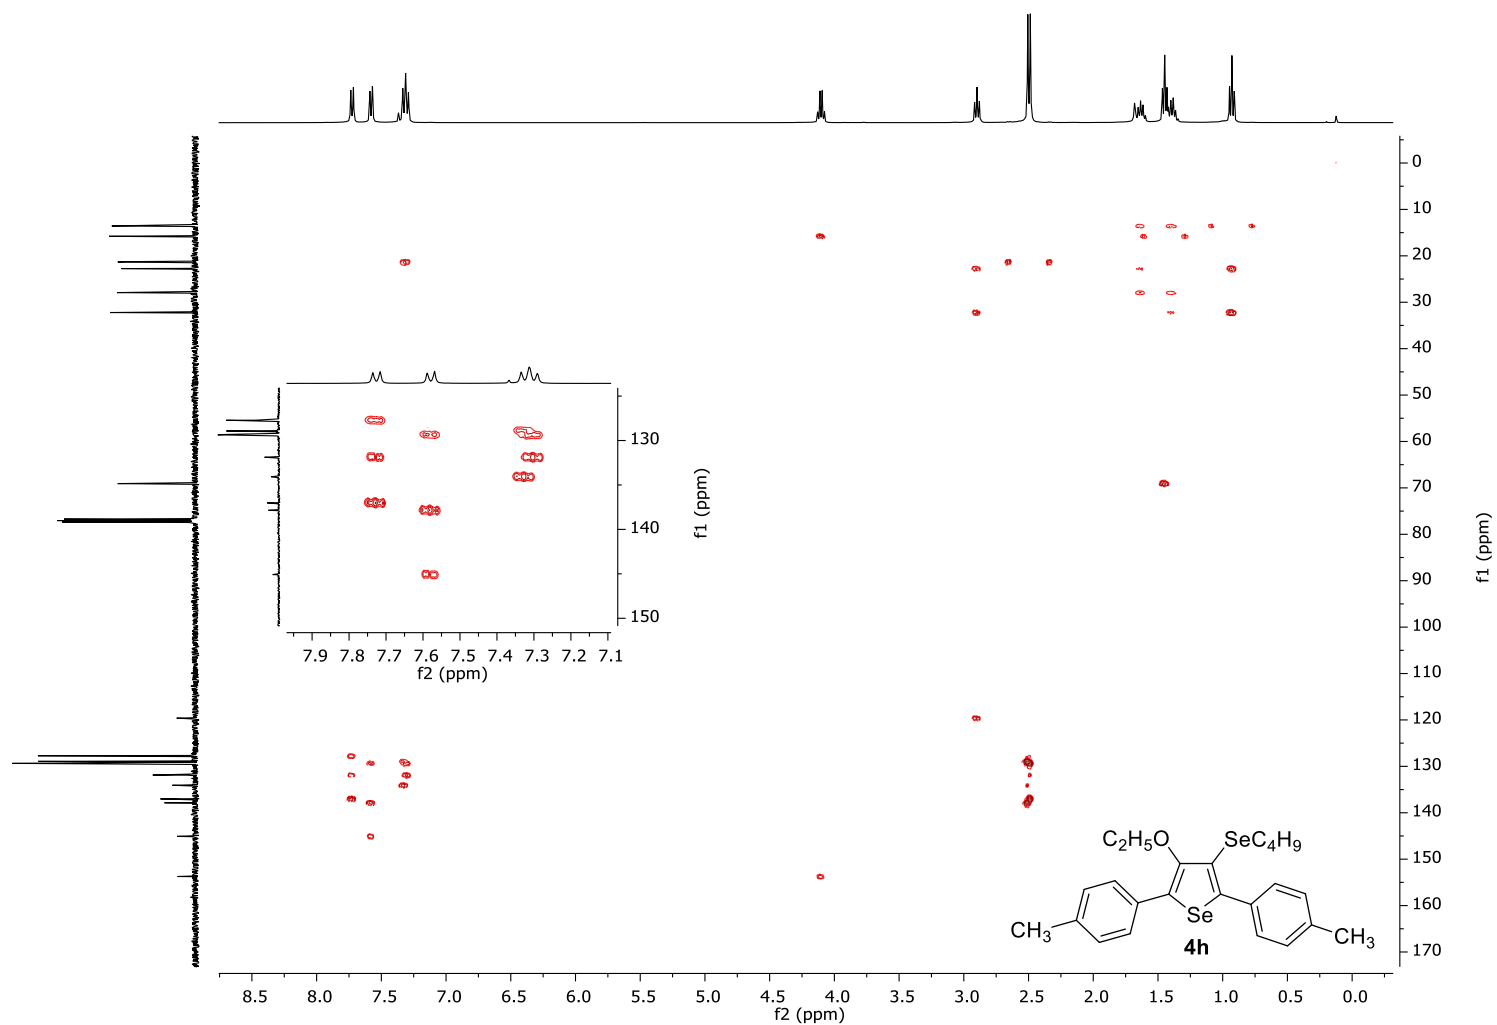

**Figure S29:**  $^1\text{H}$ - $^{13}\text{C}$  HMBC NMR-2D (400 MHz,  $\text{CDCl}_3$ ) spectrum of compound **4h**.

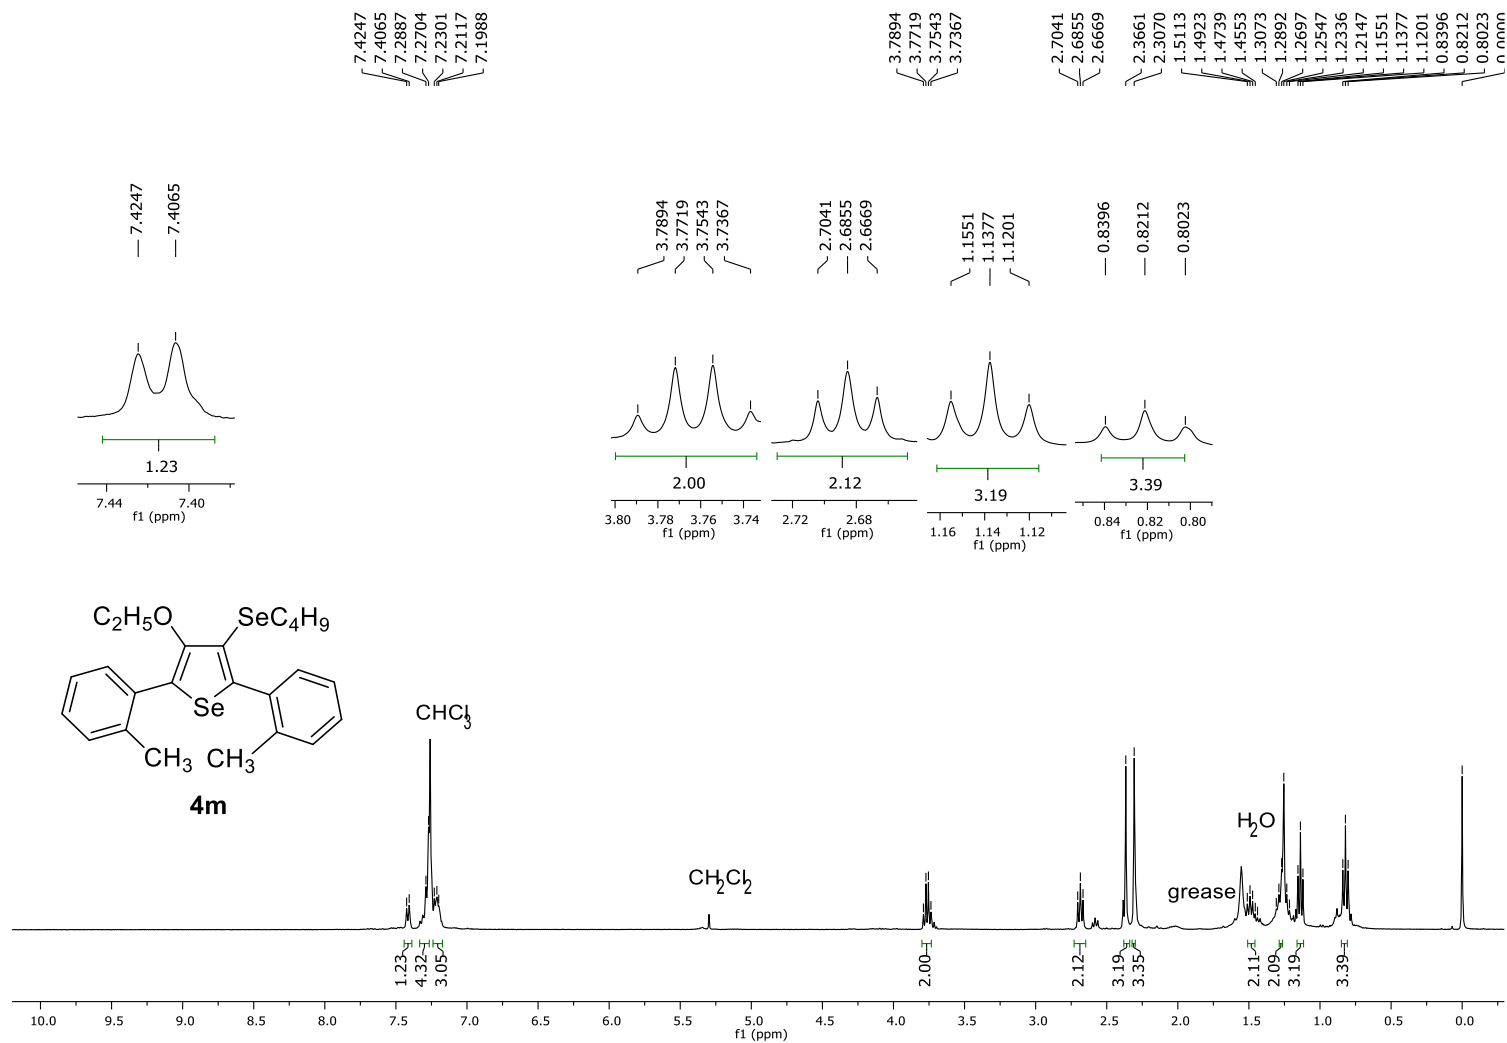

**Figure S30:** <sup>1</sup>H NMR (400 MHz, CDCl<sub>3</sub>) spectrum of compound **4m**.

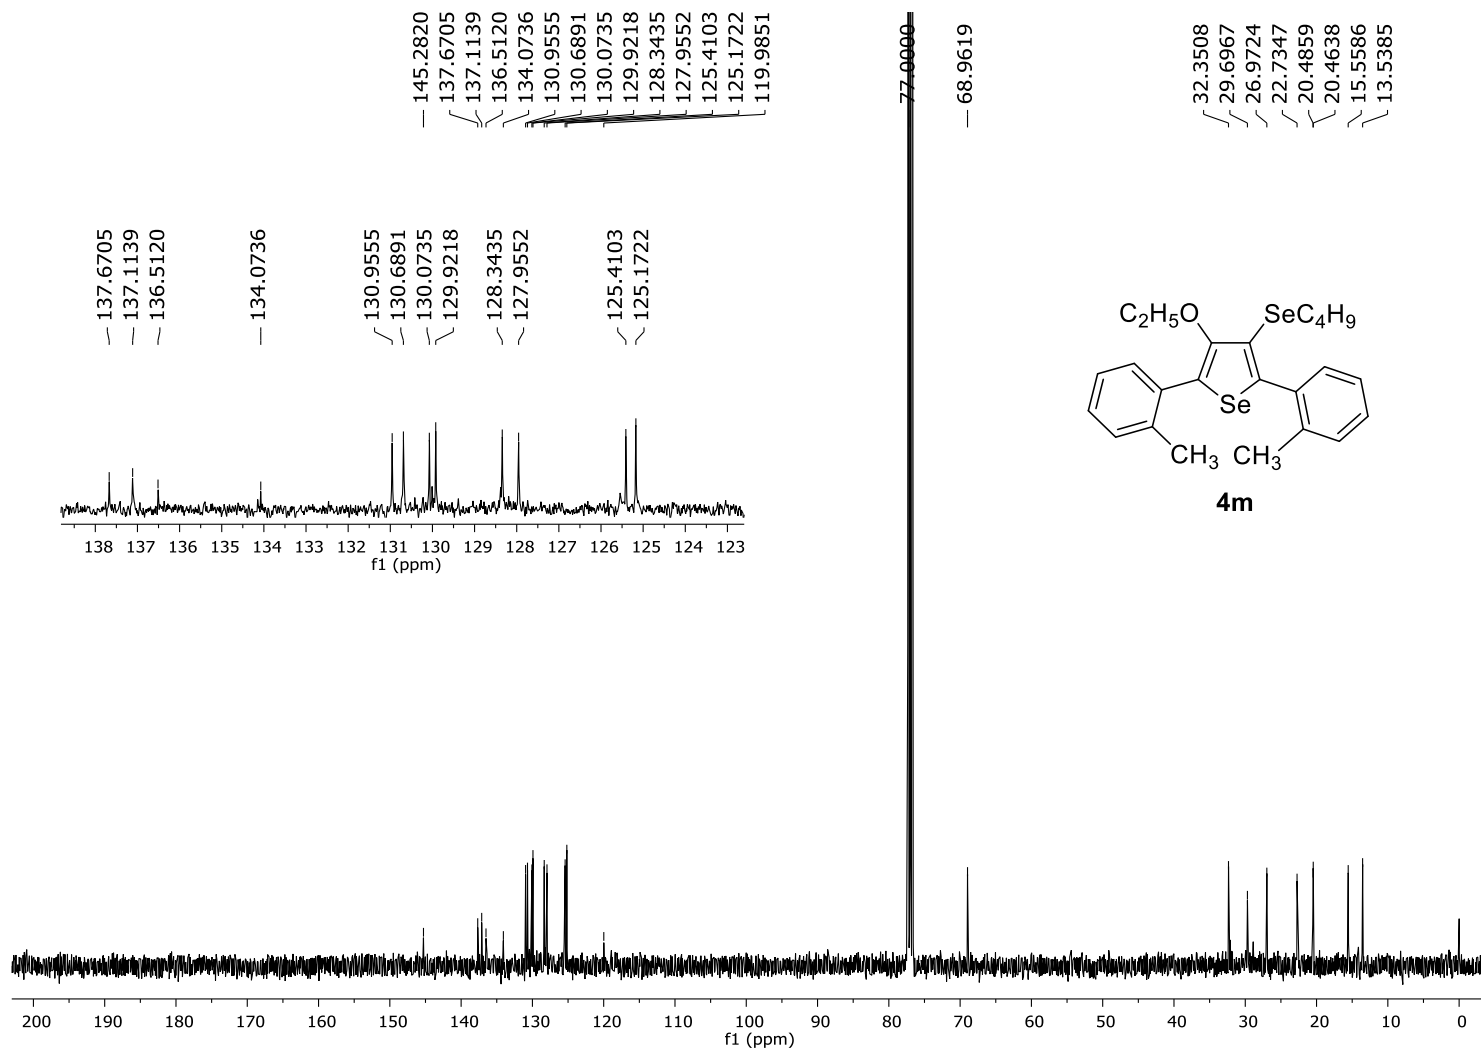

**Figure S31:** <sup>13</sup>C NMR (100 MHz, CDCl<sub>3</sub>) spectrum of compound **4m**.

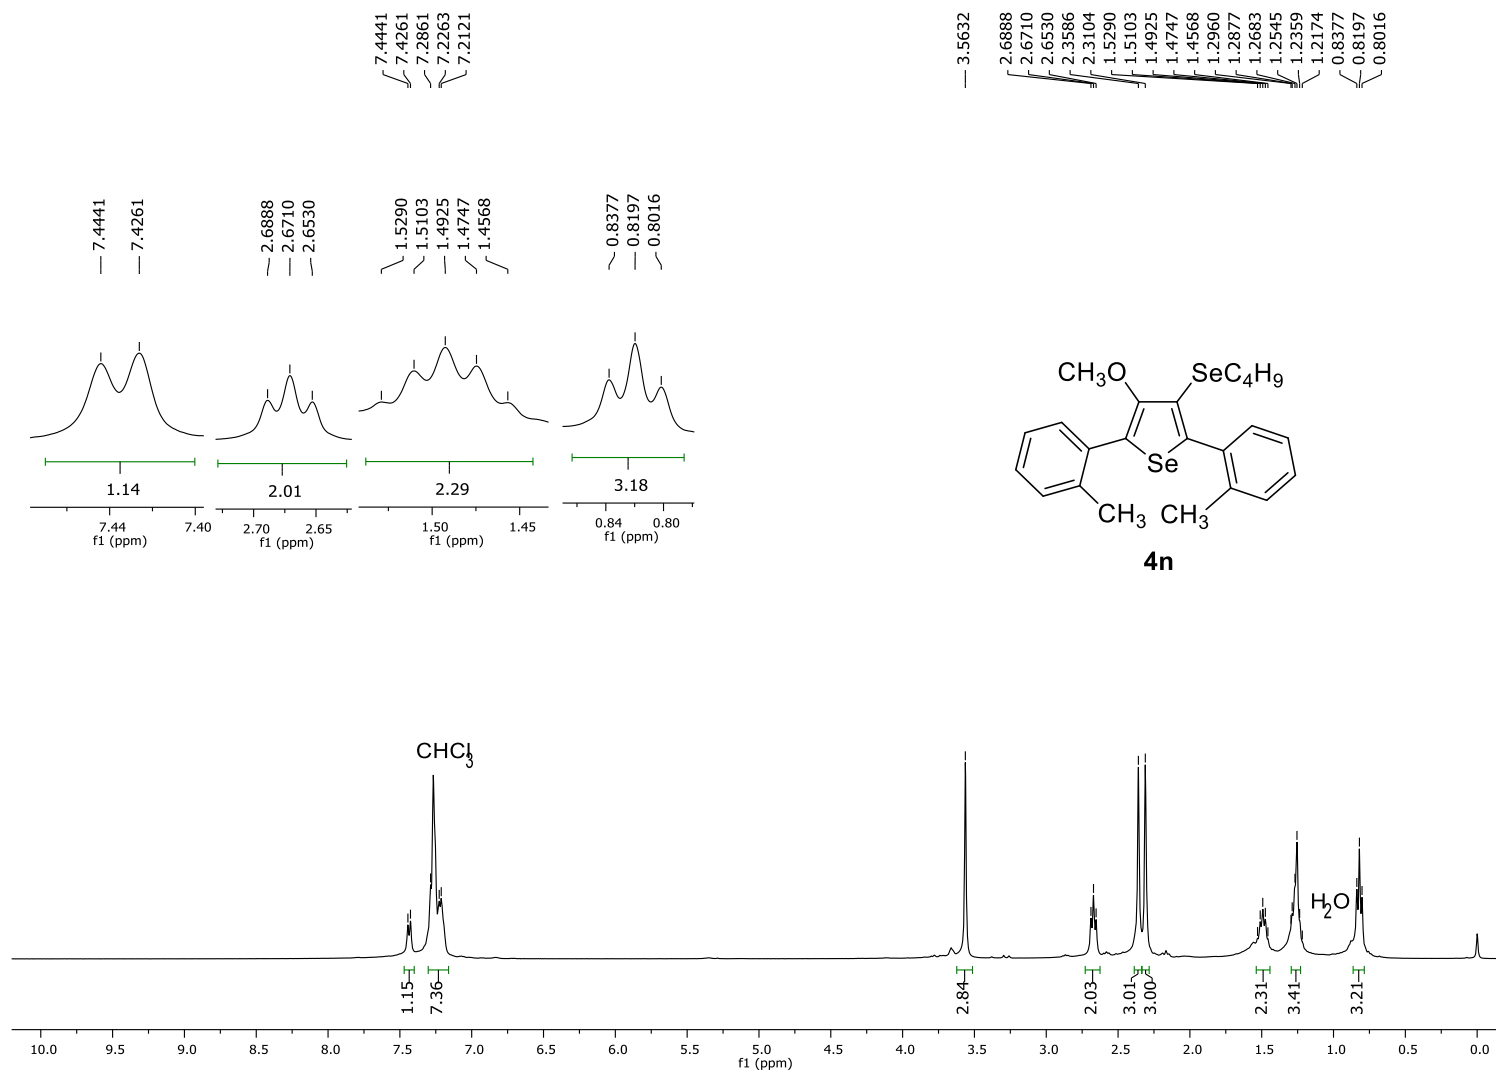

**Figure S32:** <sup>1</sup>H NMR (400 MHz, CDCl<sub>3</sub>) spectrum of compound **4n**.

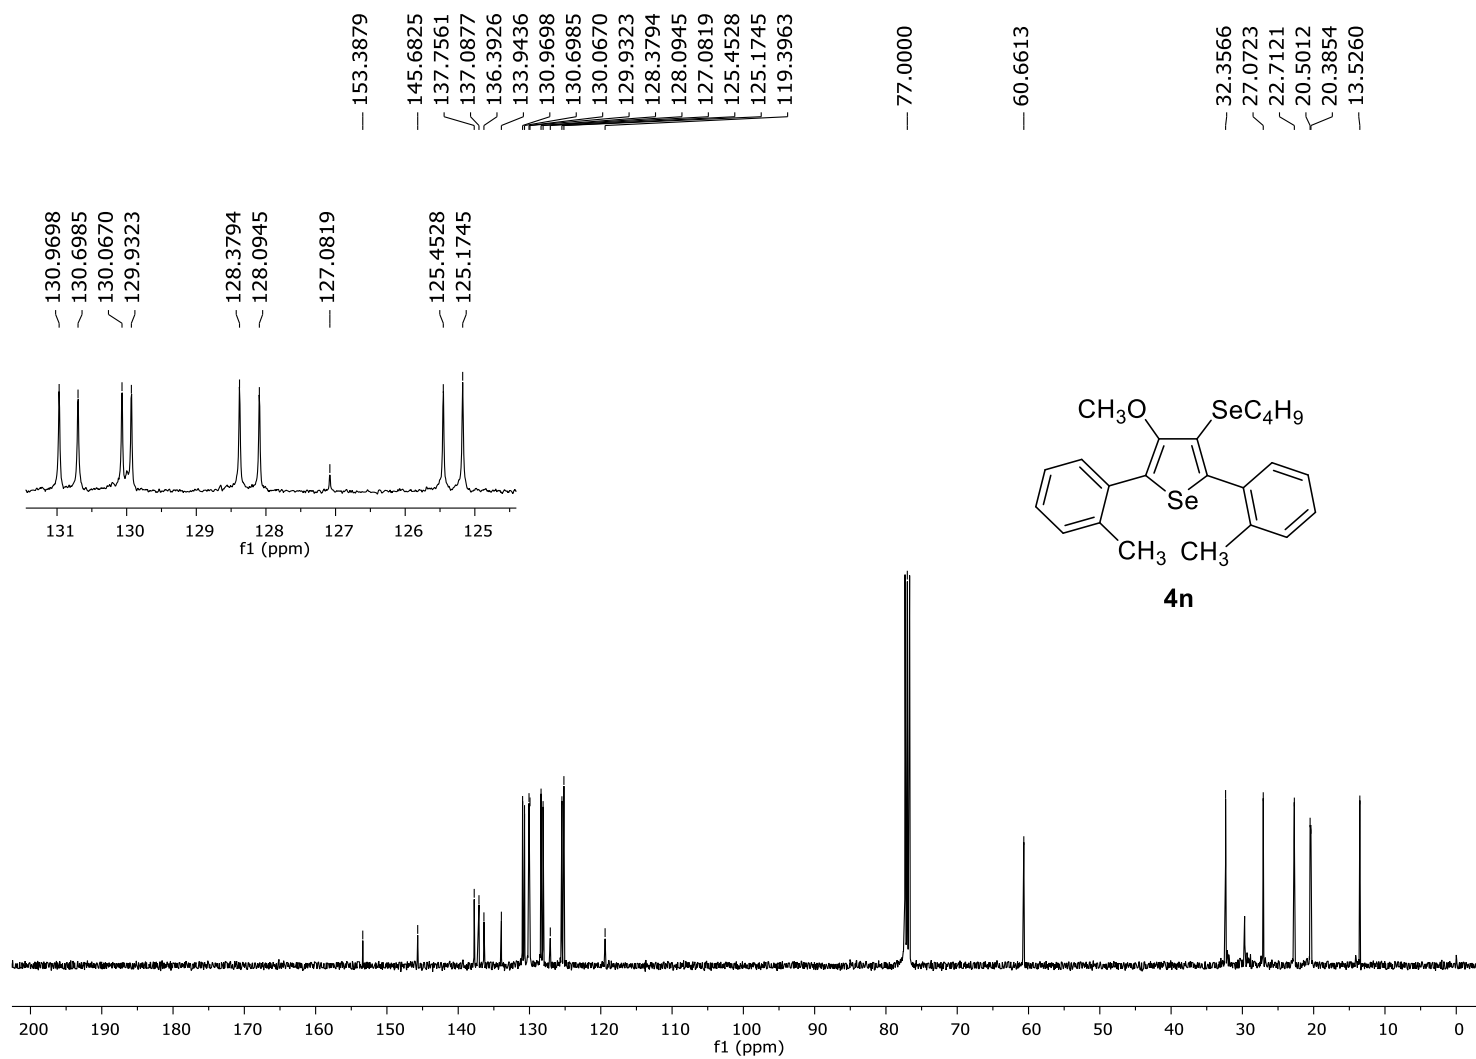

**Figure S33:** <sup>13</sup>C NMR (100 MHz, CDCl<sub>3</sub>) spectrum of compound **4n**.

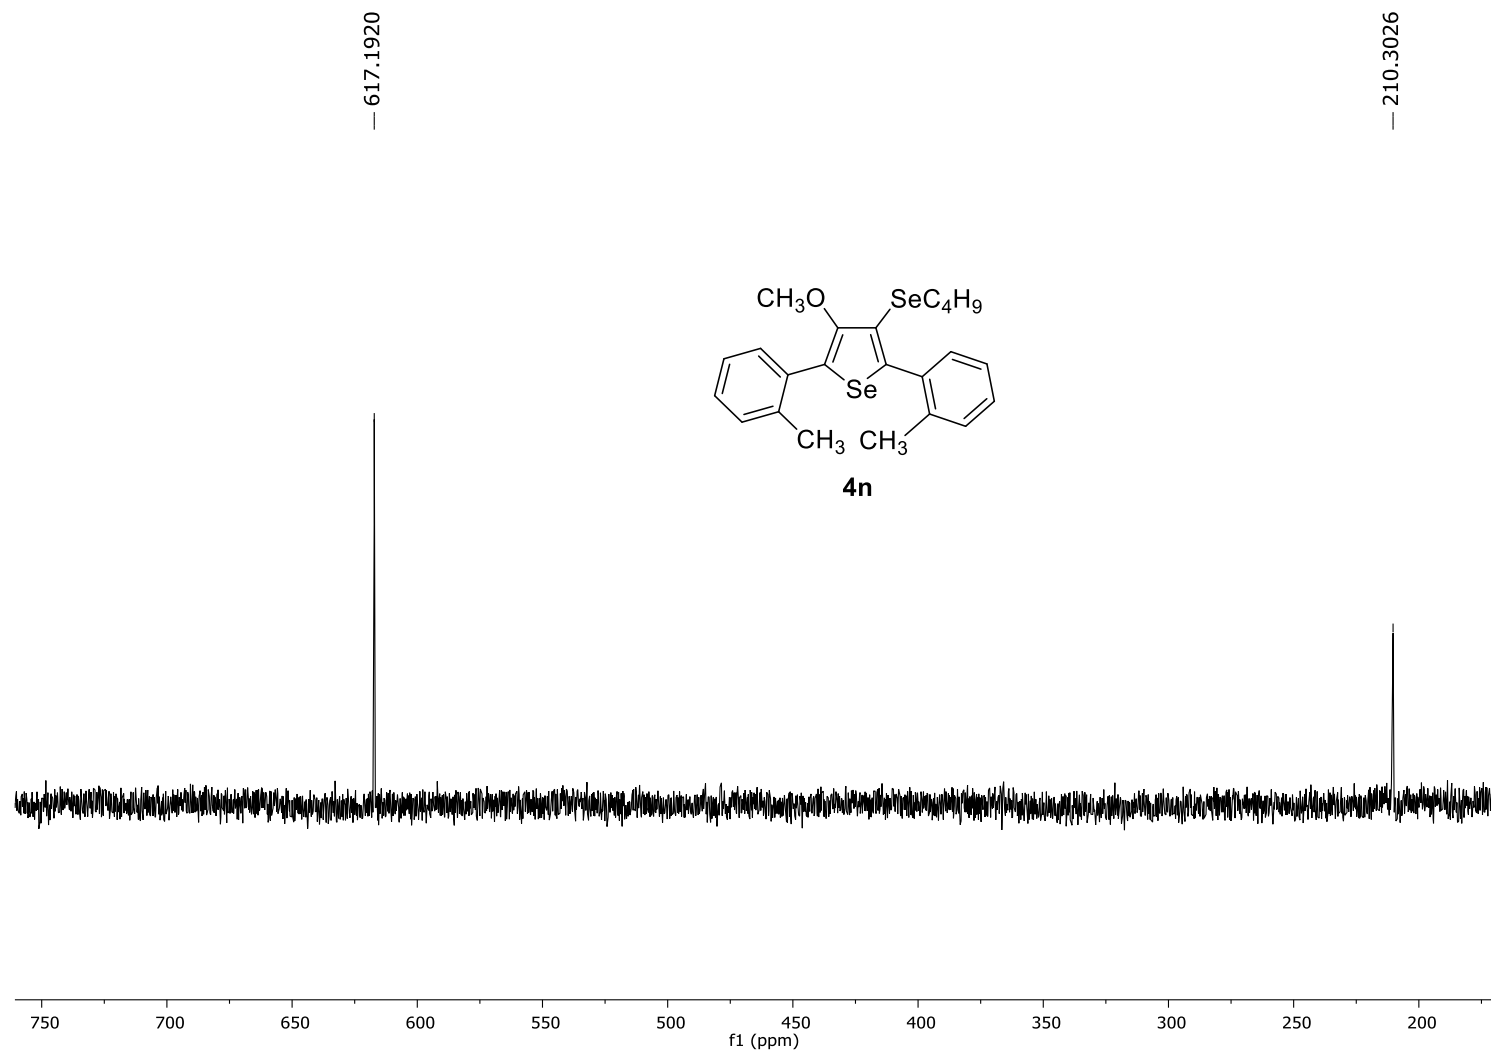

**Figure S34:**  $^{77}\text{Se}$  NMR (76 MHz,  $\text{CDCl}_3$ ) spectrum of compound **4n**.

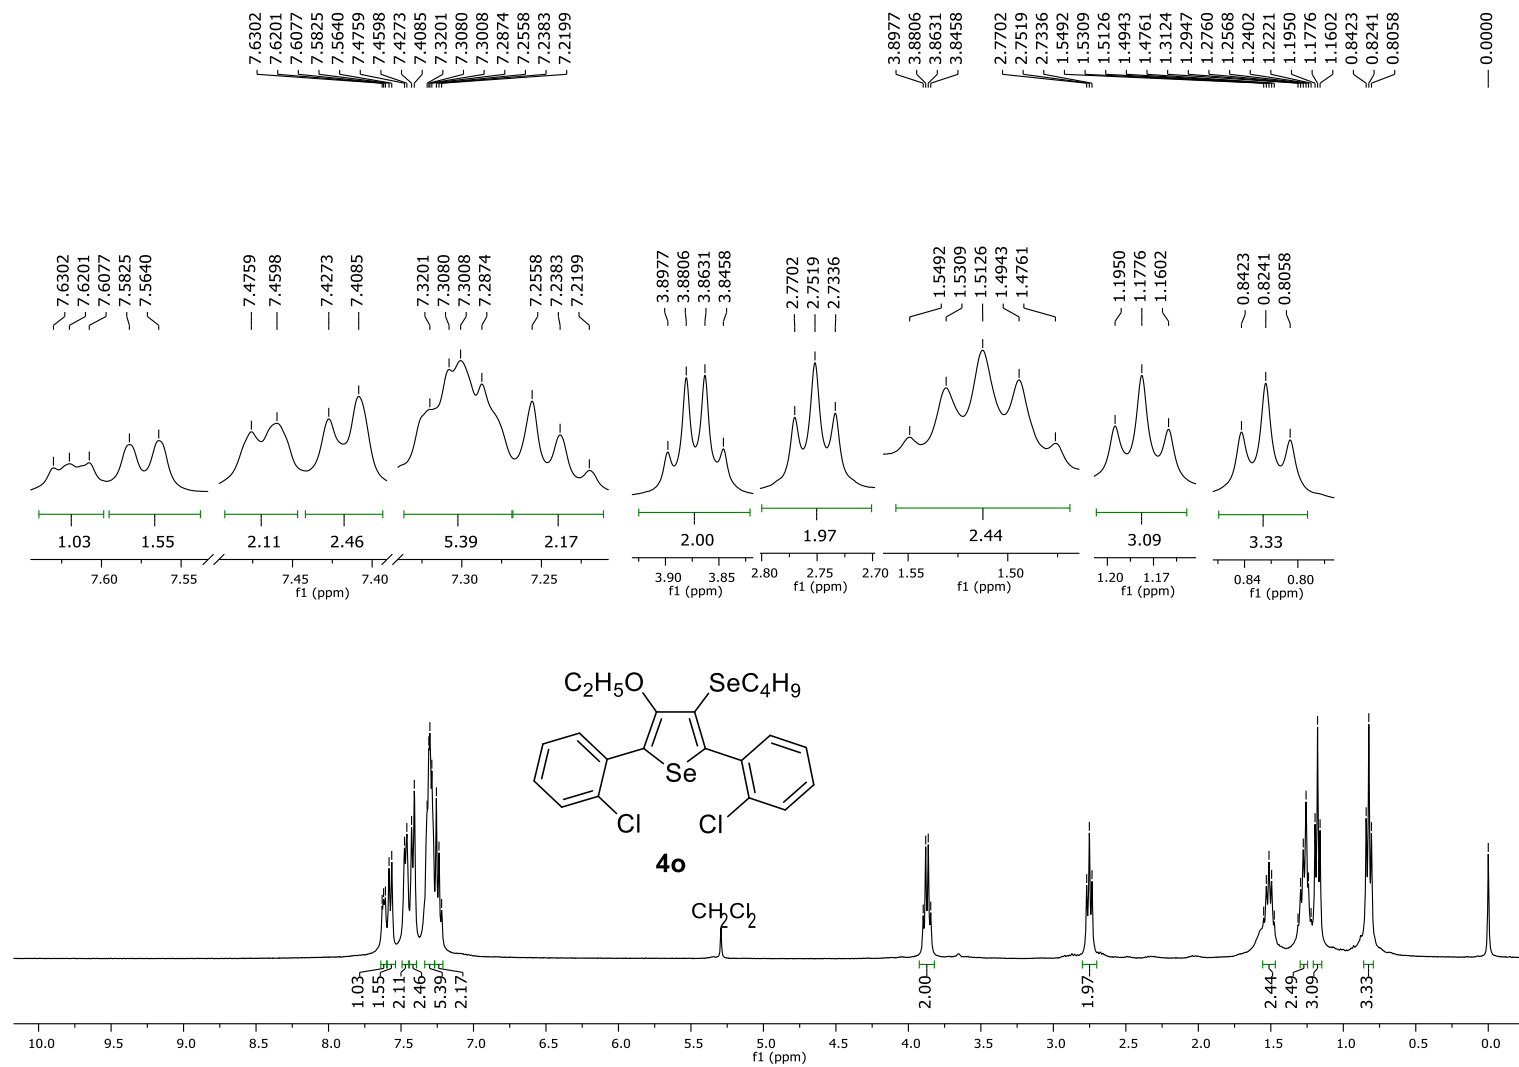

**Figure S35:** <sup>1</sup>H NMR (400 MHz, CDCl<sub>3</sub>) spectrum of compound **4o**.

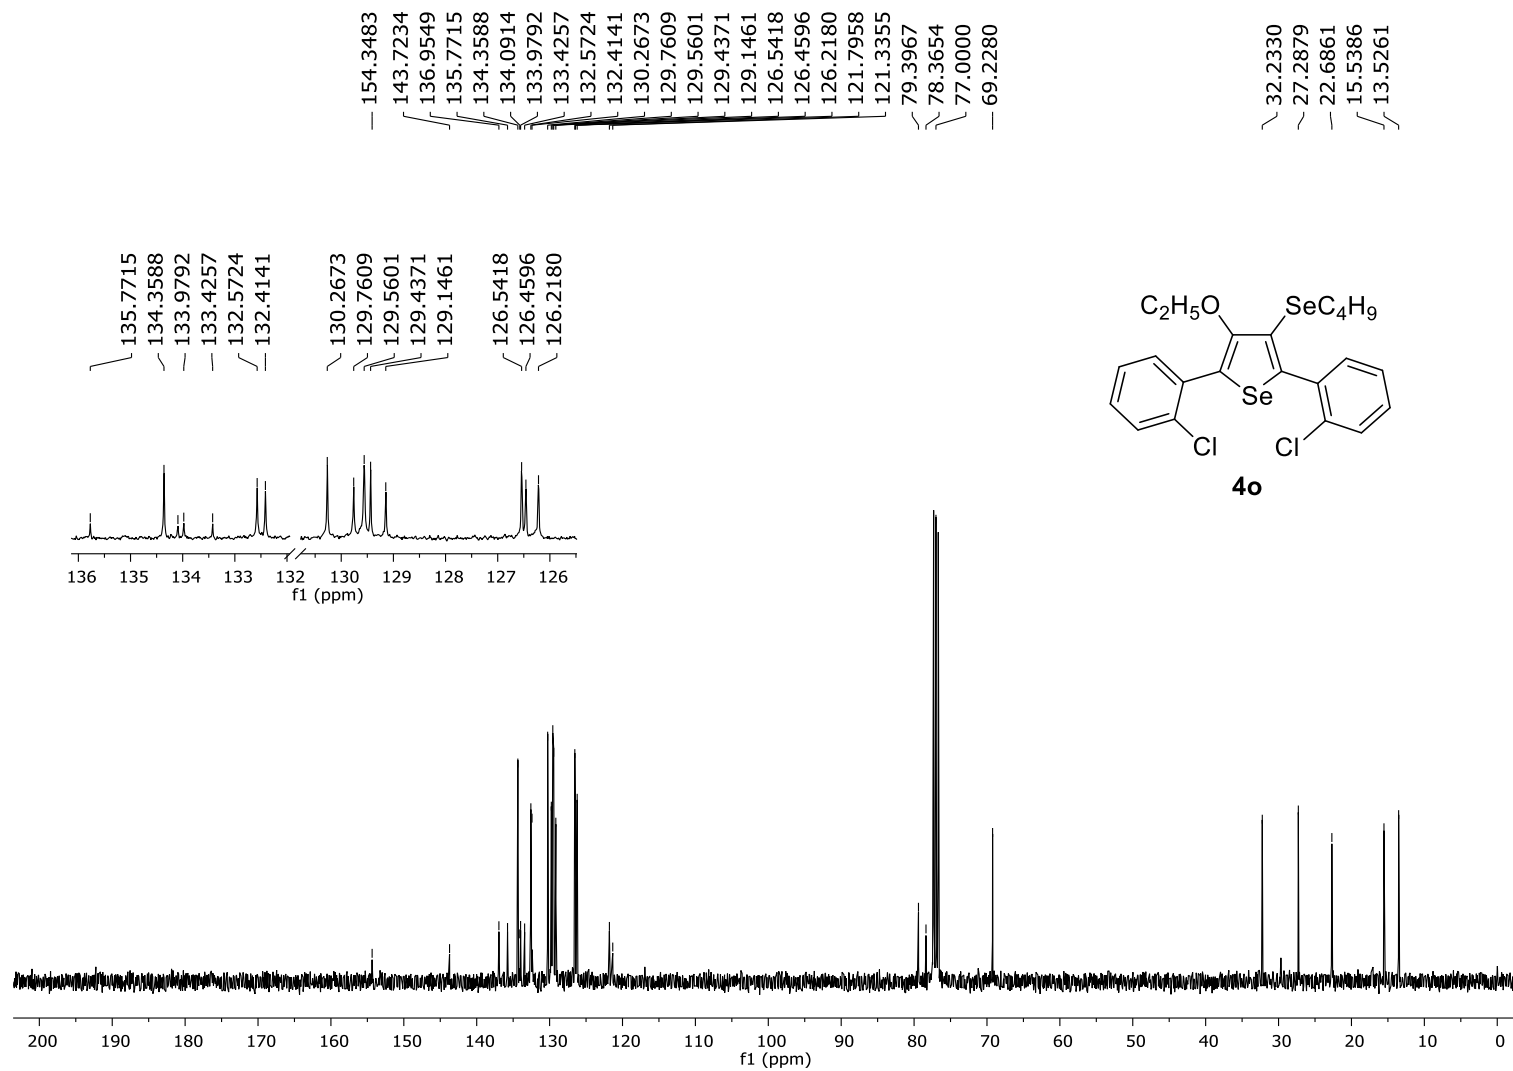

**Figure S36:** <sup>13</sup>C NMR (100 MHz, CDCl<sub>3</sub>) spectrum of compound **4o**.

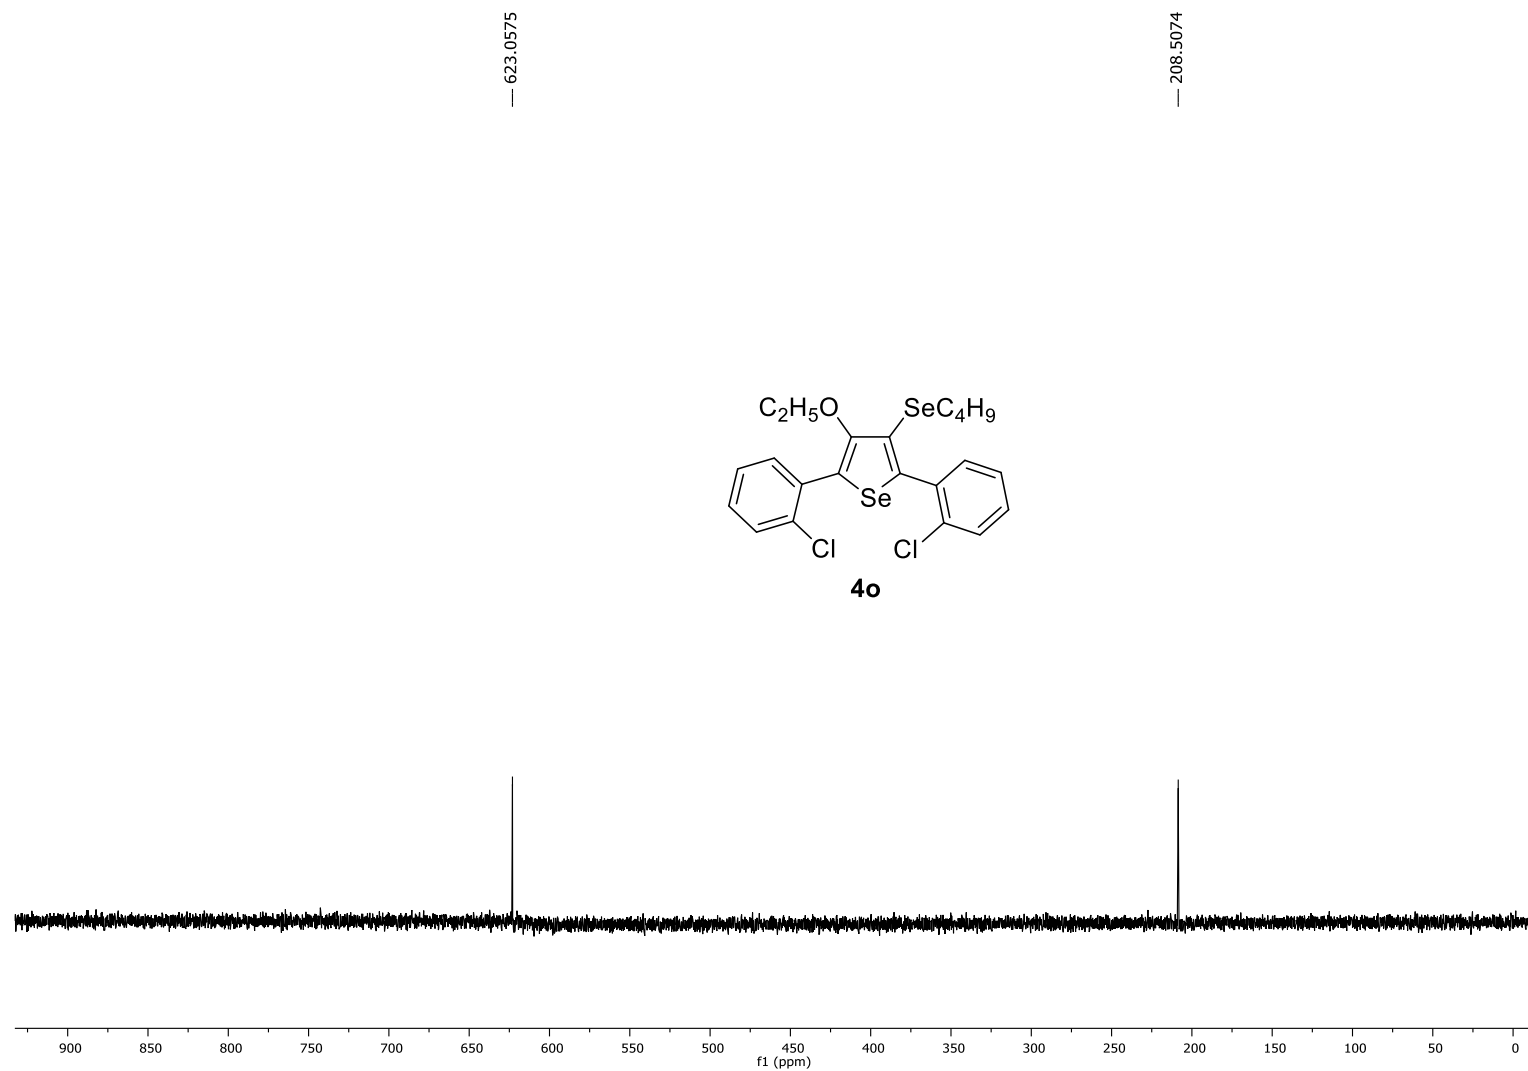

**Figure S37:**  $^{77}\text{Se}$  NMR (76 MHz,  $\text{CDCl}_3$ ) spectrum of compound **4o**.

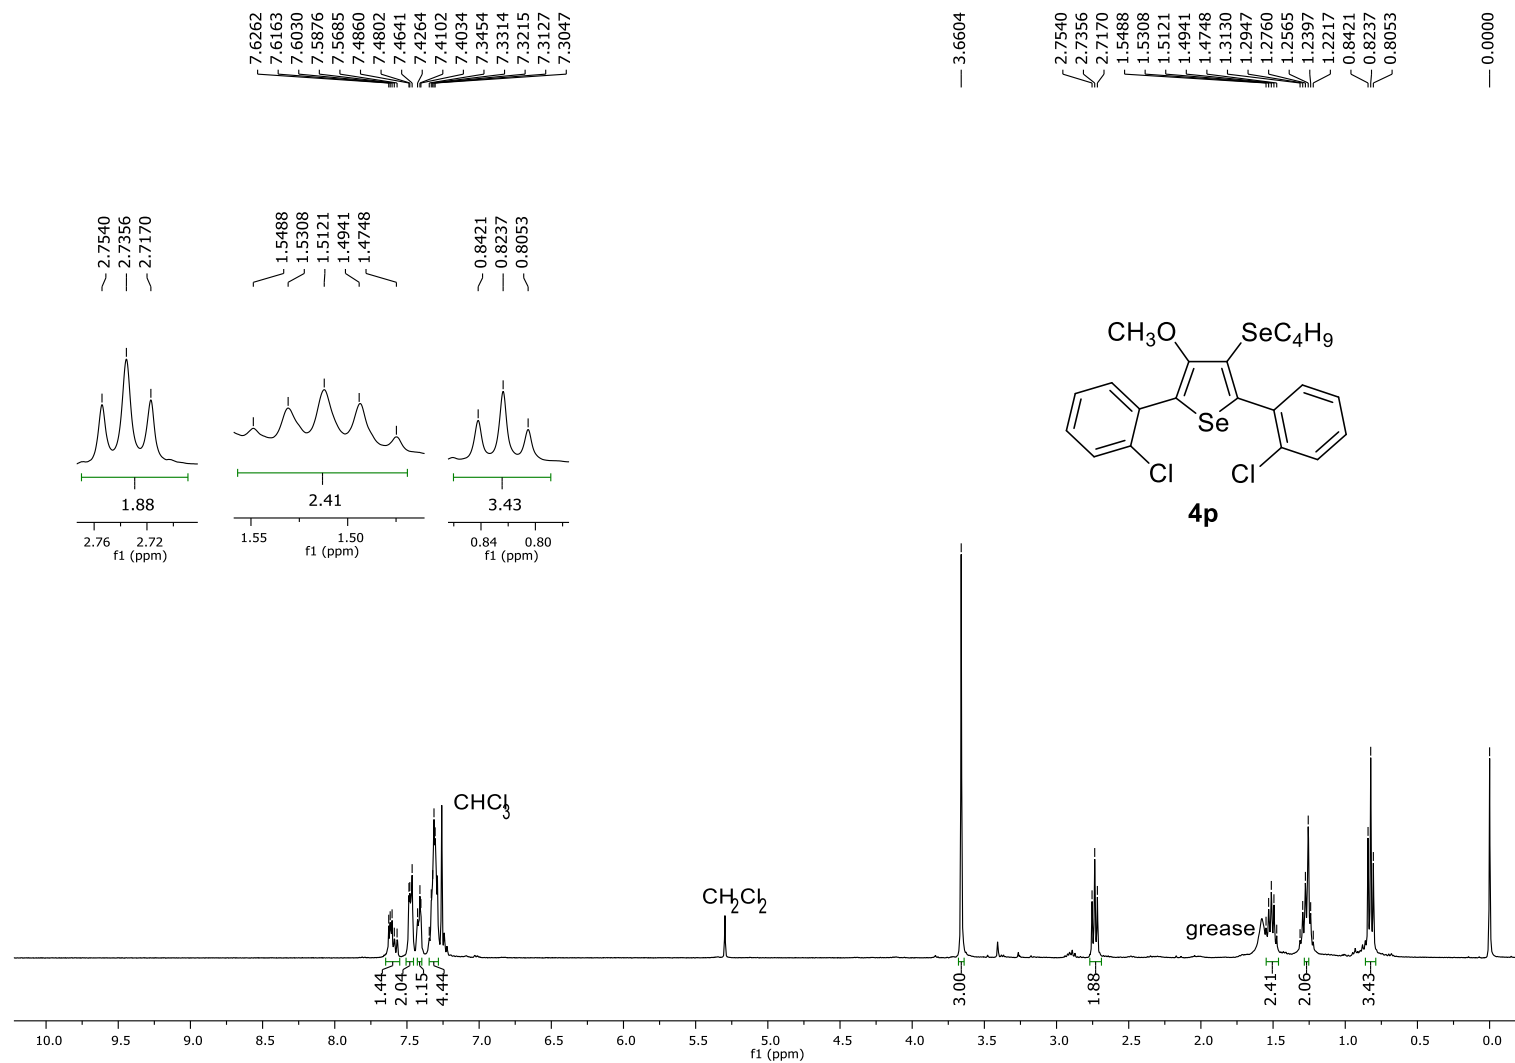

**Figure S38:** <sup>1</sup>H NMR (400 MHz, CDCl<sub>3</sub>) spectrum of compound **4p**.

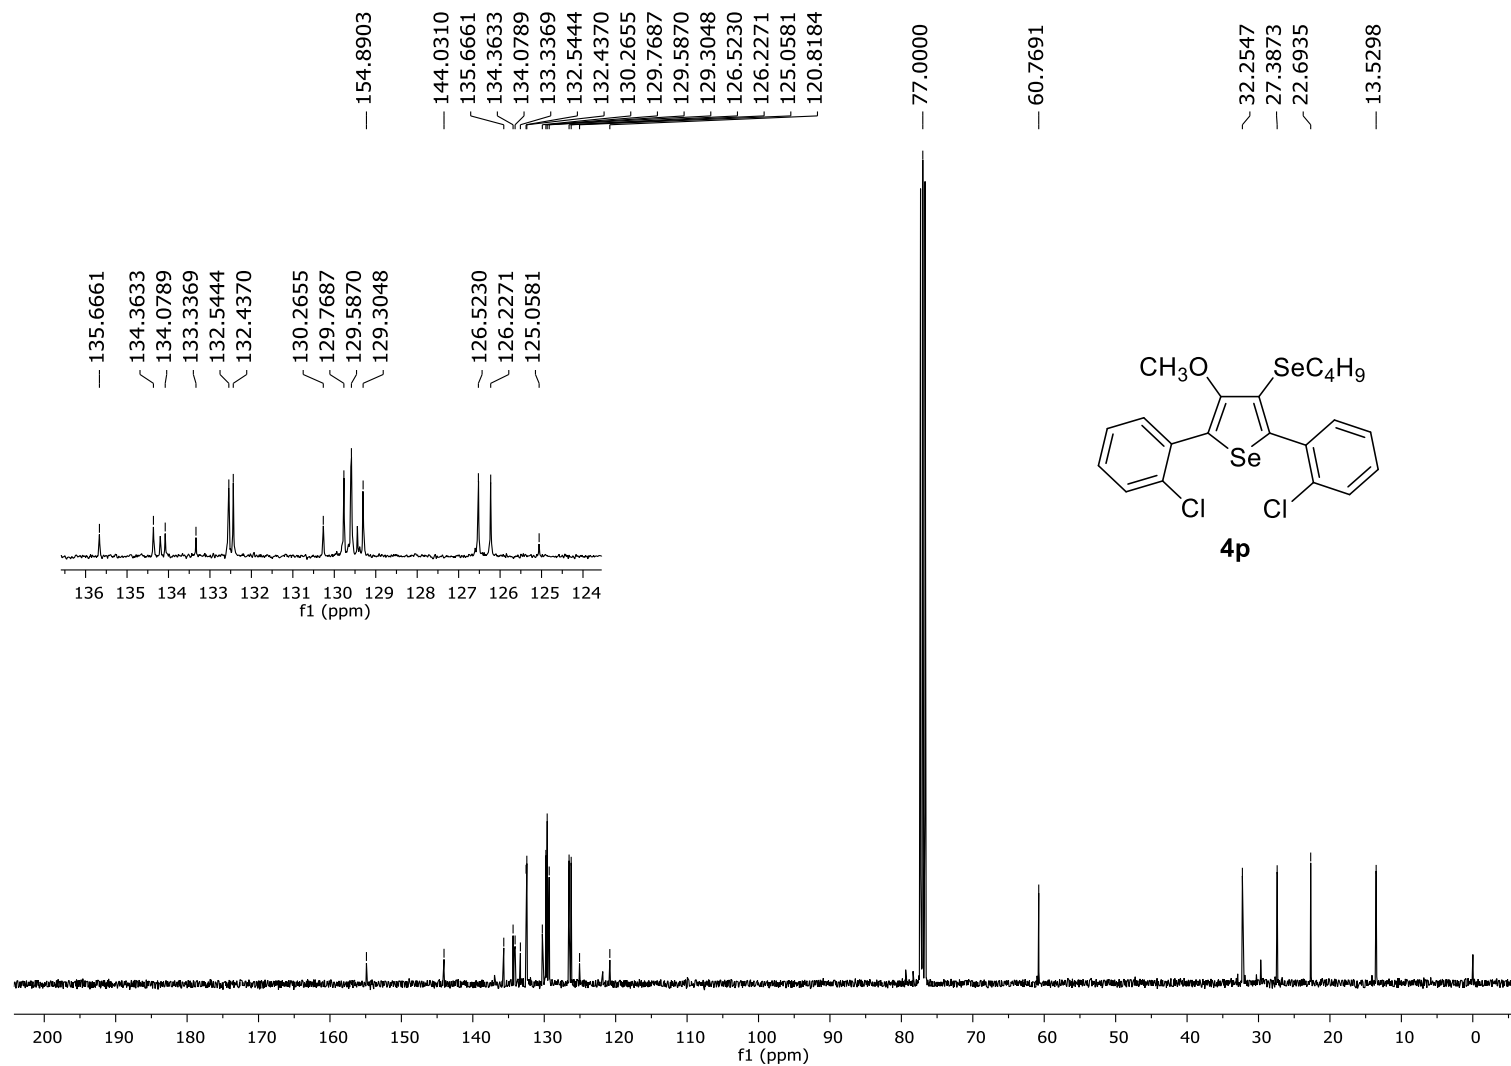

**Figure S39:** <sup>13</sup>C NMR (100 MHz, CDCl<sub>3</sub>) spectrum of compound **4p**.

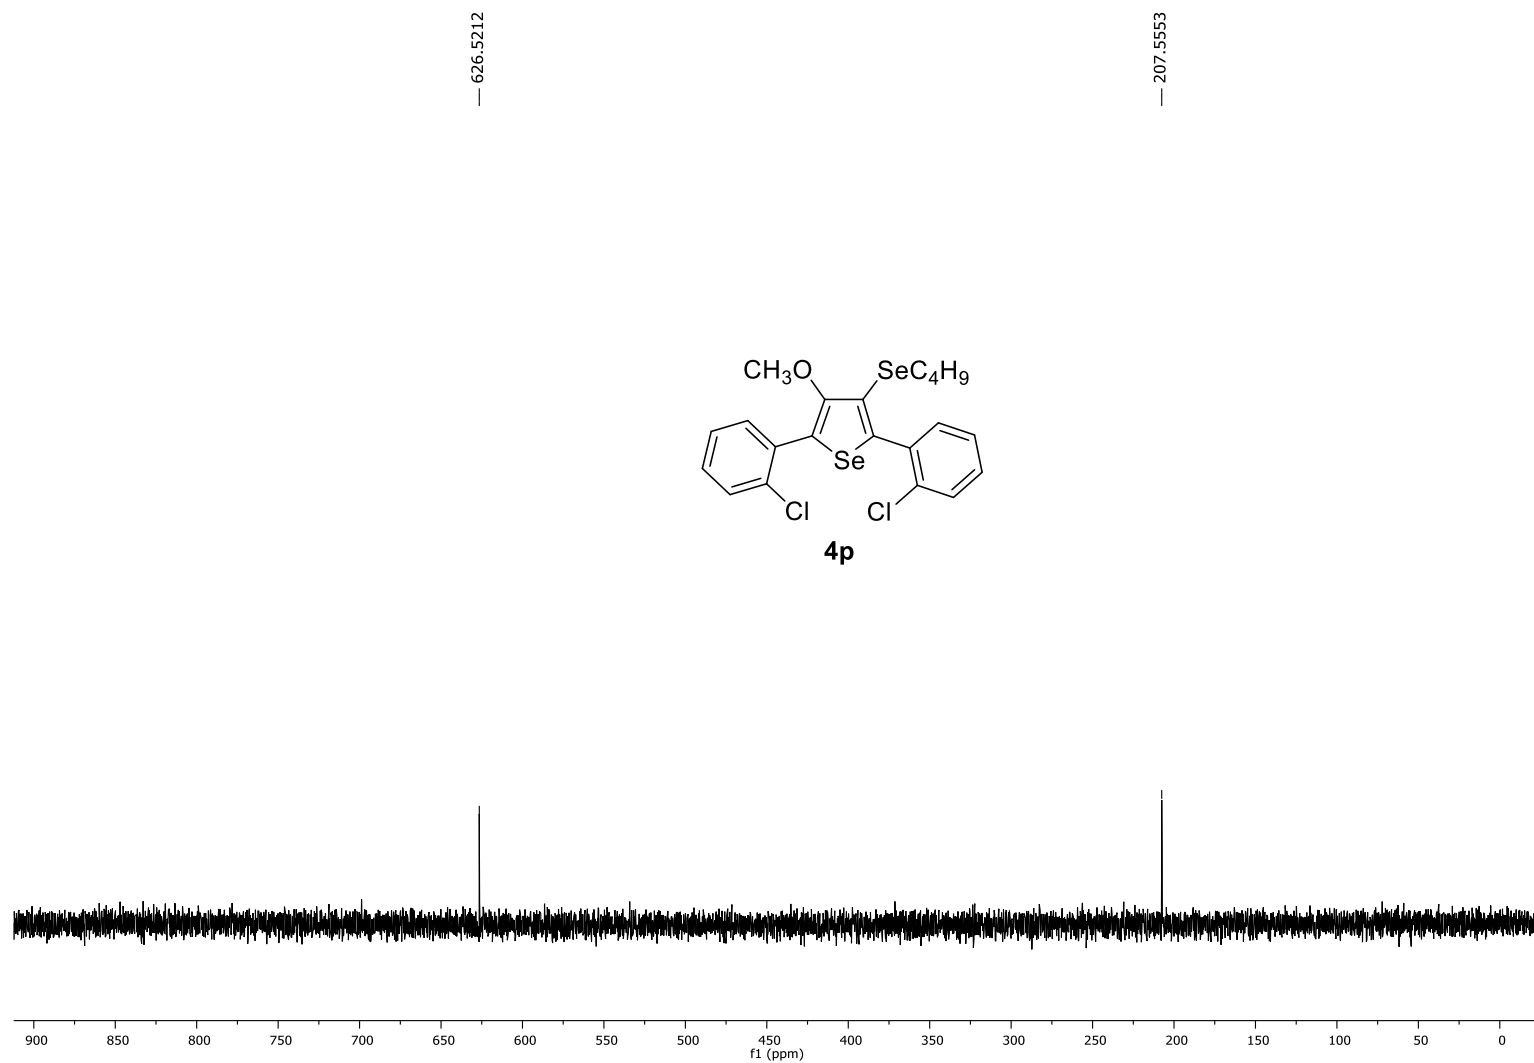

**Figure S40:**  $^{77}\text{Se}$  NMR (76 MHz,  $\text{CDCl}_3$ ) spectrum of compound **4p**.
